# 1 Targeting Chromatin Effector Pygo2 to Enhance Immunotherapy in 2 Prostate Cancer

3  
4 Yini Zhu<sup>1,2</sup>, Yun Zhao<sup>1</sup>, Jiling Wen<sup>1</sup>, Sheng Liu<sup>3</sup>, Tianhe Huang<sup>1</sup>, Ishita Hatia<sup>4</sup>, Xiaoxia Peng<sup>1</sup>,  
5 Hawraa Al Janabi<sup>1</sup>, Gang Huang<sup>1</sup>, Jackson Mittlesteadt<sup>1</sup>, Michael Cheng<sup>5</sup>, Atul Bhardwaj<sup>4</sup>,  
6 Brandon L. Ashfeld<sup>4</sup>, Kenneth R. Kao<sup>6</sup>, Dean Y. Maeda<sup>7</sup>, Xing Dai<sup>8</sup>, Olaf Wiest<sup>4</sup>, Brian S.J.  
7 Blagg<sup>4</sup>, Xuemin Lu<sup>1</sup>, Liang Cheng<sup>9</sup>, Jun Wan<sup>3,10,11</sup>, Xin Lu<sup>1,2,12\*</sup>

## 10 Affiliations:

11 <sup>1</sup> Department of Biological Sciences, Boler-Parseghian Center for Rare and Neglected  
12 Diseases, Harper Cancer Research Institute, University of Notre Dame, Notre Dame, IN 46556,  
13 USA

14 <sup>2</sup> Integrated Biomedical Sciences Graduate Program, University of Notre Dame, Notre Dame, IN  
15 46556, USA

16 <sup>3</sup> Department of Medical and Molecular Genetics, Indiana University School of Medicine,  
17 Indianapolis, IN 46202, USA.

18 <sup>4</sup> Department of Chemistry and Biochemistry, Warren Family Research Center for Drug  
19 Discovery and Development, University of Notre Dame, Notre Dame, IN 46556, USA

20 <sup>5</sup> Indiana University School of Medicine, Indianapolis, IN 46202, USA.

21 <sup>6</sup> Terry Fox Cancer Research Labs, Division of Biomedical Sciences, Faculty of Medicine,  
22 Memorial University, St. John's Campus, NL A1B 3V6, Canada

23 <sup>7</sup> Syntrix Biosystems, Inc., Auburn, WA 98001, USA

24 <sup>8</sup> Department of Biological Chemistry, School of Medicine, University of California, Irvine, CA  
25 92697, USA

26 <sup>9</sup> Department of Pathology and Laboratory Medicine, Indiana University School of Medicine,  
27 Indianapolis, IN 46202, USA.

28 <sup>10</sup> Center for Computational Biology and Bioinformatics, Indiana University School of Medicine,  
29 Indianapolis, IN 46202, USA.

30 <sup>11</sup> School of Informatics and Computing, Indiana University - Purdue University at Indianapolis,  
31 Indianapolis, IN 46202, USA.

32 <sup>12</sup> Tumor Microenvironment and Metastasis Program, Indiana University Melvin and Bren Simon  
33 Comprehensive Cancer Center, Indianapolis, IN 46202, USA

34

35 **\*Corresponding author:** Xin Lu, Ph.D., [xlu@nd.edu](mailto:xlu@nd.edu)

36

37 **Declaration of Conflict of Interest:** The authors declare no potential conflicts of interest.

38 **ABSTRACT**

39 The noninflamed microenvironment in prostate cancer represents a barrier to immunotherapy.  
40 Genetic alterations underlying cancer cell-intrinsic oncogenic signaling have emerging roles in  
41 shaping the immune landscape. Recently, we identified *Pygopus 2 (PYGO2)* as the driver  
42 oncogene for the amplicon at 1q21.3. Here, using transgenic mouse models of metastatic prostate  
43 adenocarcinoma, we found that *Pygo2* deletion decelerated tumor progression, diminished  
44 metastases, and extended survival. *Pygo2* loss augmented the infiltration of cytotoxic T  
45 lymphocytes (CTLs) and sensitized tumor cells to T cell killing. Mechanistically, *Pygo2*  
46 orchestrated a p53/Sp1/Kit/Ido1 signaling network to foster a microenvironment hostile to CTLs.  
47 Genetic or pharmacological inhibition of *Pygo2* enhanced the anti-tumor efficacy of  
48 immunotherapies using immune checkpoint blockade, adoptive cell transfer, or myeloid-derived  
49 suppressor cell inhibitors. In human prostate cancer samples, *Pygo2* expression was inversely  
50 correlated with CD8<sup>+</sup> T cells. Our results highlight a promising path to improving immunotherapy  
51 with targeted therapy for lethal prostate cancer.

52

53

54 **KEYWORDS**

55 Immune checkpoint blockade, prostate cancer, PMN-MDSC, CUT&RUN, *Pygo2*, p53, Kit, Ido1,  
56 JBC117, genetically engineered mouse model

## 57 INTRODUCTION

58 Tumor resistance to immunotherapy remains a significant challenge <sup>2</sup>. Among cancer  
59 types refractory to immune check blockade (ICB), advanced prostate cancer (PCa) exhibits  
60 overwhelming *de novo* resistance to anti-CTLA4 or anti-PD1 therapies <sup>3-6</sup>. A tumor  
61 microenvironment (TME) poorly infiltrated by immune cells or infiltrated by broad immunocytes  
62 but void of cytotoxic T lymphocytes (CTLs) in the tumor core is considered immunologically cold.  
63 To combat resistance to immunotherapy, therapeutic efforts using targeted agents to convert cold  
64 to hot TME are promising approaches. PCa is generally considered immunologically cold, where  
65 T lymphocytes are primarily located in the adjacent normal structures <sup>8</sup>, or the tumor stroma, but  
66 rarely the invasive epithelium <sup>9</sup>. A cold TME can be shaped by genetic alterations and oncogenic  
67 pathways intrinsic to cancer cells <sup>12,13</sup>. Advanced PCa is characterized by rampant chromosomal  
68 instability and copy number alterations, including deletions and amplifications <sup>14</sup>. Using genetically  
69 engineered mouse (GEM) models, studies have revealed the differential effects of the loss of  
70 distinct tumor suppressor genes (*Pten*, *Zbtb7a*, *p53*, *Pml*, and *Smad4*) on the infiltration frequency  
71 and activity of various myeloid populations <sup>15,16</sup>. For example, we reported that in the *PB-Cre4<sup>+</sup>*  
72 *Pten<sup>L/L</sup> Smad4<sup>L/L</sup>* model, *Smad4* loss caused Yap1-mediated upregulation of Cxcl5 in tumor cells,  
73 which in turn recruited Cxcr2<sup>+</sup> polymorphonuclear myeloid-derived suppressor cells (PMN-  
74 MDSCs) to antagonize anti-tumor T-cell immunity <sup>15</sup>. The contribution of oncogenes amplified in  
75 the PCa genome to the immunosuppressive TME is poorly understood. This is an important  
76 question because of the potential therapeutic opportunities associated with targeting amplified  
77 oncogenes.

78 Pygopus family PHD finger 2 (*PYGO2*) was recently identified through an *in vivo* functional  
79 screen as the driver oncogene for the amplicon at 1q21.3 in human PCa <sup>17</sup>. Copy number gain or  
80 amplification of *PYGO2* was detected in over 50% of primary and metastatic castration-resistant  
81 PCa cases and was associated with a higher Gleason score, shorter disease-free survival, and  
82 shorter biochemical recurrence <sup>17</sup>. At the protein level, while *PYGO2* expression was not  
83 detectable in the normal prostate, high *PYGO2* expression was correlated with a higher Gleason  
84 score, biochemical recurrence, and metastasis to lymph nodes and bone <sup>17,18</sup>. Overexpression of  
85 *PYGO2* has been documented in ovarian <sup>19</sup>, breast <sup>20</sup>, cervical <sup>21</sup>, hepatic <sup>22</sup>, lung <sup>23</sup>, intestinal <sup>24</sup>,  
86 and brain cancers<sup>25</sup>. Therefore, understanding and targeting *PYGO2* may have translational  
87 significance in various cancer types. As a chromatin effector, *PYGO2* anchors to chromatin  
88 through interactions between its plant homeodomain (PHD) and H3K4me2/3, histone  
89 modifications that mark active transcription <sup>26</sup>. *PYGO2* in turn recruits histone acetyltransferases  
90 or histone methyltransferases to promote histone modifications and augment Wnt/ $\beta$ -catenin–

91 mediated transcriptional activation<sup>27</sup>. As an emerging epigenetic switch, PYGO2 regulates stem  
92 cell self-renewal, somatic cell division, and hormone-induced gene expression through Wnt-  
93 dependent<sup>28,29</sup> and Wnt-independent pathways<sup>30,31</sup>. To date, studies on PYGO2 have focused  
94 on its cell-autonomous functions. In the current study, we used GEM models of PCa to discover  
95 the cell non-autonomous role of PYGO2 in shaping the immunosuppressive TME of PCa,  
96 particularly the poor infiltration and activity of effector T cells. Importantly, genetic ablation or  
97 pharmacological inhibition of PYGO2 sensitizes PCa to ICB, adoptive T-cell therapy (ACT), and  
98 PMN-MDSC inhibition, illuminating a clinical path hypothesis for combining PYGO2-targeted  
99 therapy and immunotherapy in the treatment of lethal PCa.

## 100 RESULTS

### 101 **Pygo2 promotes PCa progression and metastasis in GEM and syngeneic models.**

102 The function of Pygo2 during spontaneous PCa development was not defined. To investigate this,  
103 we crossed Pygo2 loxP allele<sup>32</sup> with the metastatic prostate adenocarcinoma GEM model, *PB-*  
104 *Cre4<sup>+</sup> Pten<sup>L/L</sup> Smad4<sup>L/L</sup>* (pDKO)<sup>15,33</sup>, and generated *PB-Cre4<sup>+</sup> Pten<sup>L/L</sup> Smad4<sup>L/L</sup> Pygo2<sup>L/L</sup>* (pTKO)  
105 mice (**Fig. 1a**). Prostate-specific Pygo2 loss was evident in pTKO mice (**Fig. 1b**). pTKO mice  
106 exhibited decelerated tumor growth by approximately two months, as detected by magnetic  
107 resonance imaging (MRI) (**Fig. 1c**). The median survival of pTKO mice was extended by ten  
108 weeks compared with pDKO mice (**Fig. 1d**). To compare histological features at equivalent tumor  
109 sizes, we harvested tumors from 12-week pDKO mice and 18-week pTKO mice (n=5, **Fig. 1e**).  
110 Immunohistochemistry (IHC) showed lower proliferation and stronger apoptosis in pTKO tumors  
111 than pDKO tumors (**Fig. 1f**).

112 The tamoxifen-inducible *Nkx3.1<sup>CreERT2</sup>* allele enables temporal control of gene deletion in  
113 prostatic epithelial cells<sup>34</sup>. We generated *Nkx3.1<sup>CreERT2/+</sup> Pten<sup>L/L</sup> Smad4<sup>L/L</sup> Rosa26-LSL-Luc<sup>L/L</sup>*  
114 (nDKO<sup>Luc</sup>) and *Nkx3.1<sup>CreERT2/+</sup> Pten<sup>L/L</sup> Smad4<sup>L/L</sup> Pygo2<sup>L/L</sup> Rosa26-LSL-Luc<sup>L/L</sup>* (nTKO<sup>Luc</sup>) mice and  
115 confirmed tamoxifen-induced Pygo2 expression loss (**Fig. 1g**). Consistent with the *PB-Cre4-*  
116 based models, nTKO<sup>Luc</sup> mice survived 12.8 weeks (median survival) longer than nDKO<sup>Luc</sup> mice  
117 (**Fig. 1h**), consistent with slower tumor growth in the former (**Fig. 1i**). Metastases to draining  
118 lymph nodes and lungs were also attenuated in nTKO<sup>Luc</sup> compared to nDKO<sup>Luc</sup> mice (**Fig. 1j**).

119 To facilitate mechanistic studies, we used CRISPR/cas9 to knockout *Pygo2* in the  
120 previously reported murine PCa cell line TS3132, which was derived from the pDKO model and  
121 formed tumors when implanted in immune-deficient mice<sup>33</sup> (**Fig. 1k**). Pygo2 knockout significantly  
122 decreased colony formation (**Extended Data Fig. 1a-b**) and attenuated subcutaneous tumor  
123 growth (**Fig. 1l**). TS3132 sublines were labeled with a tk-GFP-luciferase reporter<sup>35</sup> and injected  
124 intracardially into nude mice. Pygo2 knockout largely depleted the metastatic ability in bone, lungs,  
125 liver, and brain (**Extended Data Fig. 1c-e**). TS3132 was derived from mice with a mixed genetic  
126 background; therefore, it cannot grow in immune-competent mice. To facilitate the study of Pygo2  
127 function in tumor immune regulation, we established *Pten/Smad4* (PS) and *Pten/Smad4/Pygo2*  
128 (PSP) cell lines from pDKO and pTKO tumors (**Fig. 1m**). When injected subcutaneously into  
129 C57BL/6 males, PS tumors grew significantly faster than PSP tumors (**Fig. 1n**). These newly  
130 established GEM and syngeneic models reinforced the PCa-promoting function of Pygo2 and  
131 prompted us to investigate the previously uncharacterized mechanisms underlying this function.

132

### 133 **Pygo2 restricts CTL infiltration and attenuates CTL killing of PCa cells**

134 To assess the potential role of Pygo2 in modulating the TME, we used mass cytometry (CyTOF)  
135 to quantify the primary immune cell populations in pDKO and pTKO tumors. CD8<sup>+</sup> T cells were  
136 significantly increased in pTKO tumors (**Fig. 2a, Extended Data Fig. 2a**). The higher infiltration  
137 of total T cells and CD8<sup>+</sup> T cell subsets in pTKO than pDKO tumors was validated by IHC (**Fig.**  
138 **2b**). When nDKO<sup>Luc</sup> and nTKO<sup>Luc</sup> tumors were compared using flow cytometry, Pygo2-deficient  
139 tumors had increased CD8<sup>+</sup> T cells, increased CD4<sup>+</sup> T cells, and decreased T<sub>reg</sub> fraction in CD4<sup>+</sup>  
140 T cells (**Fig. 2c**). Similar differences were observed in pDKO and pTKO tumors (**Extended Data**  
141 **Fig. 2b**). We previously reported that the most prominent immune population in pDKO tumors  
142 was PMN-MDSCs<sup>15</sup>. PMN-MDSCs are tumor-infiltrating neutrophils with immunosuppressive  
143 activity<sup>36</sup>. We confirmed similar levels of PMN-MDSCs and macrophages between pDKO and  
144 pTKO tumors and between nDKO<sup>Luc</sup> and nTKO<sup>Luc</sup> tumors (**Extended Data Fig. 2c**), suggesting  
145 that the infiltration difference of T cell subsets by Pygo2 loss was unlikely to be explained by  
146 changes in PMN-MDSCs. Consistent with spontaneous tumors, syngeneic PSP tumors harbored  
147 more CD8<sup>+</sup> and CD4<sup>+</sup> T cells and a higher CD8<sup>+</sup>/T<sub>reg</sub> ratio (**Fig. 2d**). Critically, this pattern was  
148 reversed by restoring Pygo2 expression in PSP cells (**Fig. 2d**), supporting a causal role of Pygo2  
149 in PCa cells in dictating T cell phenotypes.

150 Based on the negative impact of Pygo2 on effector T cells in the TME, we postulated that  
151 Pygo2 in PCa cells might drive resistance to T-cell killing. We stably expressed chicken ovalbumin  
152 (OVA) in PS and PSP cell lines and co-cultured these sublines with OVA-specific TCR-transgenic  
153 CD8<sup>+</sup> T cells (OT-I). PSP-OVA cells were more sensitive to OT-I T-cell killing than PS-OVA cells  
154 (**Fig. 2e**). To rule out that the function of Pygo2 in regulating tumor-T cell interactions is specific  
155 to the Pten/Smad4 model, we silenced Pygo2 expression with CRISPR/cas9 in the murine PCa  
156 cell line RM9 (transformed by *ras* and *myc*<sup>37</sup>) (**Extended Data Fig. 2d**). Applying the OVA/OT-I  
157 system to RM9 sublines corroborated that Pygo2 loss sensitized PCa cells to T-cell killing  
158 (**Extended Data Fig. 2e**). While Pygo2 knockout in RM9 affected tumor growth modestly in nude  
159 mice (**Fig. 2f**), it augmented T cell infiltration and dramatically decreased tumor formation in  
160 C67BL/6 mice (**Fig. 2g, Extended Data Fig. 2f**). We depleted CD8<sup>+</sup> T cells in C57BL/6 mice  
161 bearing PS and PSP tumors using an anti-CD8 neutralizing antibody (**Fig. 2h, Extended Data**  
162 **Fig. 2g**). CTL ablation had little impact on PS tumor growth but significantly restored the PSP  
163 tumor growth (**Fig. 2i-j**). Taken data from different models, we conclude that Pygo2 expression in  
164 PCa cells elicits cell non-autonomous activity to restrict effector T cell infiltration and cytotoxicity.

165

166 **Pygo2 promotes PCa progression through Kit upregulation in a Wnt-independent manner**

167 Despite functional and clinical validation of Pygo2 in driving PCa progression<sup>17,18</sup>, the mechanism  
168 underlying Pygo2 function in PCa remains poorly understood. To identify Pygo2-regulated genes,  
169 we dissociated pDKO and pTKO tumors with *B. Licheniformis* protease at 4°C to minimize artificial  
170 changes in gene expression patterns<sup>38</sup>, followed by epithelial cell purification and microarray  
171 profiling (**Fig. 3a**). We identified 379 differentially expressed (DE) probes (p<0.05) between pDKO  
172 and pTKO tumor cells and validated several by qRT-PCR (**Extended Data Fig. 3a-c**,  
173 **Supplementary Table 1**). Gene set enrichment analysis (GSEA) with MSigDB hallmark gene  
174 sets showed that the p53 pathway and epithelial-mesenchymal transition (EMT) pathway were  
175 enriched in pDKO tumor cells, whereas immune-related pathways, such as interferon  $\alpha$  response,  
176 interferon  $\gamma$  response, complement, and IL6-JAK-STAT3 signaling, were enriched in pTKO tumor  
177 cells (**Fig. 3b**, **Supplementary Table 2-3**). We reasoned that Pygo2 might exert its  
178 immunomodulatory activity through specific mediators. To find the mediator(s), we performed an  
179 upstream analysis based on DE genes with Ingenuity pathway analysis (IPA). A list of putative  
180 upstream regulators was identified, including the receptor tyrosine kinase Kit, which was  
181 downregulated in pTKO tumor cells (**Supplementary Table 4**). Among the genes downregulated  
182 in pTKO PCa cells, multiple were mapped as Kit downstream genes by IPA (**Fig. 3c**). We  
183 validated Pygo2-loss-induced *Kit* downregulation using sorted pDKO and pTKO PCa cells (**Fig.**  
184 **3d**). At the protein level, Kit and some of the Kit-downstream signaling proteins were attenuated  
185 in pTKO tumors compared to pDKO tumors (**Fig. 3e**). Among them, Ido1 was reported to drive  
186 Kit-induced T-cell suppression in gastrointestinal stromal tumors (GIST)<sup>39</sup>. Kit downregulation by  
187 Pygo2 knockout was evident in PCa cell lines (**Fig. 3f**). IHC confirmed higher Kit and Ido1  
188 expression in pDKO than pTKO tumors (**Fig. 3g**).

189 Kit has oncogenic functions in GIST and acute myeloid leukemia. To determine whether  
190 Kit is essential for the pro-tumor function of Pygo2, we first confirmed that Kit inhibitor imatinib  
191 decreased PS spheroid formation and migration but had no effect on PSP (**Fig. 3h**, **Extended**  
192 **Data Fig. 3d**). Next, *Kit* shRNA knockdown decelerated the growth of PS tumors but generated  
193 no further tumor-retarding effect on the slow-growing PSP tumors in C57BL/6 mice (**Fig. 3i-j**,  
194 **Extended Data Fig.3e**), supporting that Kit is downstream of Pygo2. Rescuing Kit expression in  
195 PSP recovered spheroid formation (**Fig. 3k**) and *in vivo* tumorigenicity to the level of PS (**Fig. 3l**).  
196 These results established a causal relationship of the Pygo2-Kit axis in driving PCa.

197 To determine whether Pygo2 function in PCa and the Pygo2-Kit axis involve Wnt/ $\beta$ -catenin  
198 signaling, we first stained  $\beta$ -catenin in PS cells and pDKO tumors and found an almost exclusive  
199 cell membrane (but not nuclear) localization of  $\beta$ -catenin (**Fig. 3m**). This result is consistent with  
200 the lack of enrichment of the Wnt signaling pathway in a previous study that compared pDKO and



201 *PB-Cre4<sup>+</sup> Pten<sup>L/L</sup>* tumors <sup>33</sup>, indicating that Wnt signaling is not activated in pDKO. Moreover, a  
202 survey of the expression of Wnt target genes in sorted pDKO and pTKO PCa cells revealed no  
203 difference between the two genotypes (**Extended Data Fig. 3f**). To test the involvement of Wnt  
204 signaling more directly, we used several methods to modify the pathway and examine its effect  
205 on Kit expression. First, when canonical Wnt signaling was activated in PS cells by LiCl or Wnt3a  
206 conditioned medium treatment, Kit expression was not induced (**Extended Data Fig. 3g-h**). Next,  
207 overexpression of constitutively active  $\beta$ -catenin (E $\beta$ C) in PS or RM9 cells (**Fig. 3n, Extended**  
208 **Data Fig. 3i**) enhanced the expression of classical Wnt/ $\beta$ -catenin targets but failed to affect Kit  
209 (**Fig. 3o, Extended Data Fig. 3j**). Lastly, we compared Kit levels between prostate tumors from  
210 pTKO, pDKO, and *PB-Cre4<sup>+</sup> Pten<sup>L/L</sup> Smad4<sup>L/L</sup> Apc<sup>L/L</sup>* (pPSA) mice. We recently reported the  
211 development of aggressive PCa and penile cancer in pPSA mice <sup>40</sup>. We confirmed that despite  
212 the *Apc*-loss-induced nuclear localization of  $\beta$ -catenin in pPSA tumors, no further increase in Kit  
213 staining was observed in pPSA tumors compared with pDKO tumors (**Fig. 3p**). Our results argue  
214 against the role of Wnt/ $\beta$ -catenin in Pygo2-driven Kit expression and indicate that Pygo2 regulates  
215 Kit expression in a previously uncharacterized fashion.

216

### 217 **Pygo2 cooperates with p53 to upregulate the Sp1/Kit axis**

218 Pygo2 depends on co-factors to regulate gene transcription. We first performed a connection  
219 analysis from Pygo2 to Kit using IPA (**Fig. 4a**). Only four factors were predicted to be potential  
220 mediators from Pygo2 to Kit, including CTNNB1 ( $\beta$ -catenin), UBC (ubiquitin C), PDGFRA  
221 (platelet-derived growth factor receptor A), and PDGFRB. We ruled out these factors because,  
222 first,  $\beta$ -catenin was not involved in Pygo2-Kit regulation (see above). Second, the expression of  
223 PDGFRA and PDGFRB showed no difference between pDKO and pTKO PCa cells (**Extended**  
224 **Data Fig. 4a**). Third, the connection between UBC to Pygo2 and Kit is based on protein-protein  
225 interactions that affect protein stability; thus, it is unlikely to account for Kit mRNA changes. Can  
226 Pygo2 regulate Kit by controlling the expression or activity of particular transcription factor (TF)  
227 that directly or indirectly regulate Kit? We used IPA to identify all TFs upstream of Kit (**Fig. 4a**).  
228 We filtered through them and focused on TP53 (i.e., p53) based on three findings. First, p53  
229 pathway was among the top enriched pathways in pDKO tumor cells (**Fig. 3b**). Second, a TF  
230 enrichment analysis using the upregulated genes in pDKO PCa cells identified p53 as an enriched  
231 TF in pDKO (**Fig. 4b, Supplementary Table 5-6**). Third, Pygo2 was reported to induce the  
232 accumulation and acetylation of p53 in hair follicle early progenitor cells <sup>28</sup>.

233 Can p53 mediate Kit regulation by Pygo2 and even play an indispensable role in Pygo2  
234 function in PCa? To test this functionally, we deleted *p53* with the *PB-Cre4* driver and compared

235 the survival of two pairs of mouse cohorts: *PB-Cre4<sup>+</sup> Pten<sup>L/L</sup> p53<sup>L/L</sup>* (Pten/p53) compared with *PB-*  
236 *Cre4<sup>+</sup> Pten<sup>L/L</sup> p53<sup>L/L</sup> Pygo2<sup>L/L</sup>* (Pten/p53/Pygo2), *PB-Cre4<sup>+</sup> Pten<sup>L/L</sup> Smad4<sup>L/L</sup> p53<sup>L/L</sup>*  
237 (Pten/Smad4/p53) compared with *PB-Cre4<sup>+</sup> Pten<sup>L/L</sup> Smad4<sup>L/L</sup> Pygo2<sup>L/L</sup> p53<sup>L/L</sup>*  
238 (Pten/Smad4/p53/Pygo2). Strikingly, while *Pygo2* knockout extended survival substantially in the  
239 Pten/Smad4 genetic backdrop (**Fig. 1d**), *Pygo2* loss did not affect survival in the Pten/p53 or  
240 Pten/Smad4/p53 backdrops (**Fig. 4c**). At the expression level, p53 was higher in pDKO tumors  
241 than in pTKO tumors (**Fig. 4d**). Kit and its downstream protein, Ido1, were also higher in pDKO  
242 tumors than in pTKO tumors, yet these two proteins remained unaltered between  
243 Pten/Smad4/p53 and Pten/Smad4/p53/Pygo2 tumors (**Fig. 4d**) or derived cell lines (**Extended**  
244 **Data Fig. 4b**). To investigate how *Pygo2* and p53 regulate Kit, we ruled out direct transcriptional  
245 regulation of *Pygo2* on p53 (**Extended Data Fig. 4c-d**). Instead, evidence suggests that *Pygo2*  
246 cooperates with p53 to regulate downstream genes: *Pygo2* and p53 proteins co-localized in the  
247 nuclei, detected by proximity ligation assay (PLA) (**Extended Data Fig. 4e**); *Pygo2* and p53  
248 interaction was observed using co-immunoprecipitation (co-IP) followed by western blotting  
249 (**Extended Data Fig. 4f**).

250 Post-translational modifications of p53 regulate p53 stability and activity. *Pygo2* recruits  
251 histone acetyltransferases (e.g., CBP/p300 and the STAGA complex) to modulate the activity of  
252 transcriptional co-factors<sup>27,41</sup>. Acetylation of p53 by CBP/p300 directly affects its transcriptional  
253 activity<sup>42</sup>. Using co-IP in PS cells, we confirmed the interaction between *Pygo2*, CBP/p300 and  
254 p53 (**Extended Data Fig. 4f**). A p53 reporter assay using TS3132 and *Pygo2*-knockout subline  
255 indicated that *Pygo2* deletion dampened p53 activity stimulated by nutlin-3, camptothecin (CPT),  
256 or doxorubicin (**Fig. 4e**). Consistently, p53 acetylation and phosphorylation, indicative of p53  
257 activity, were more pronounced in PS than PSP upon nutlin-3 (**Fig. 4f**) or CPT treatments  
258 (**Extended Data Fig. 4g**). Hyperactivated p53 induces cell cycle arrest and apoptosis. However,  
259 *Pygo2* did not seem to participate in this aspect of p53 function, as PS and PSP cells showed  
260 similar cell cycle profiles upon stress from nutlin-3, CPT, or doxorubicin (**Extended Data Fig. 4h**).  
261 To examine the *Pygo2*/p53 interaction in clinical samples, we surveyed the genetic status of  
262 *PYGO2* and *TP53* in the SU2C/PCF human mCRPC dataset<sup>43</sup>. *PYGO2* amplifications (13%)  
263 were mutually exclusive with *TP53* alterations (40%, mainly mutations and deep deletions) (**Fig.**  
264 **4g**). Furthermore, in the PCa TCGA cohort<sup>44</sup>, if patients were stratified into *TP53*-wild type (WT)  
265 and *TP53*-mutant groups, *PYGO2* amplification correlated with worse disease-free survival only  
266 in the *TP53*-WT group (**Fig. 4h**). Therefore, mouse and human genetic evidence support a critical  
267 role of p53 in *Pygo2* function in PCa.

268           Next, we investigated how the Pygo2/p53 interaction regulates Kit expression. Pygo2  
269 binding to histone H3K4me2/3 was crucial for Kit regulation, because Kit expression in PSP cells  
270 was rescued by ectopic expression of WT Pygo2, but not Pygo2 mutants (Y326A, W351A)  
271 deficient in H3K4me2/3 binding<sup>30,45</sup> (**Fig. 4I, Extended Data Fig. 4I**). The global association of  
272 Pygo2, p53, and H3K4me3 with chromatin was assessed using the CUT & RUN assay in PS cells.  
273 Neither Pygo2 nor p53 directly bound to *Kit* promoter region (**Extended Data Fig. 4j-k**),  
274 suggesting the existence of an intermediate regulator. A co-localized binding peak of Pygo2, p53,  
275 and H3K4me3 was found near the promoter region of *Sp1* (**Fig. 4j**), which was validated by qPCR  
276 using TS3132 sublines (**Fig. 4k**). *Sp1* is often associated with a poor prognosis and regulates  
277 transcription in a context-dependent manner<sup>46</sup>. Moreover, *Sp1* binds to *Kit* promoter region to  
278 mediate transcription in hematopoietic cells<sup>47,48</sup>. Therefore, we tested whether *Sp1* was an  
279 intermediate between Pygo2/p53 and *Kit*. *Sp1* was expressed at a lower level in PSP than PS,  
280 but showed no difference between cell lines derived from *Pten/Smad4/p53* and  
281 *Pten/Smad4/p53/Pygo2* tumors (**Extended Data Fig. 4I**), consistent with the hypothesis that  
282 Pygo2 sustains *Sp1* expression in a p53-dependent manner. At the protein level, *Sp1* was  
283 expressed at a higher level in pDKO tumors than in pTKO tumors, in concordance with the higher  
284 p53 modification and levels in pDKO tumors (**Fig. 4I**). The binding of *Sp1* to the *Kit* promoter  
285 region was confirmed by the CUT&RUN-qPCR assay (**Fig. 4m**). *Sp1* was silenced in PS cells  
286 with shRNA (**Extended Data Fig. 4M**), leading to downregulation of *Kit* expression (**Fig. 4n**) and  
287 spheroid formation (**Fig. 4o**). Plus, *Sp1* knockdown in PSP cells did not further reduce *Kit*  
288 expression or spheroid formation (**Fig. 4n-o**). We establish a previously uncharacterized pathway  
289 in PCa cells, where Pygo2 engages p53 to bind to the *Sp1* promoter and sustain *Sp1* expression,  
290 and *Sp1* subsequently promotes *Kit* transcription and expression.

291

### 292 **Pygo2 downregulates T cell infiltration through the Kit-Irf1 pathway**

293 To determine whether *Kit* is responsible for Pygo2 function in CTL impairment, we dissociated  
294 the syngeneic tumors formed by PS and PSP sublines with *Kit* knockdown or restoration (**Fig. 3**)  
295 and compared T cell infiltration frequencies. *Kit* knockdown in PS increased CD8<sup>+</sup> T cell infiltration  
296 in PS tumors to the same level as in PSP tumors, and stable expression of the same *Kit* shRNA  
297 in PSP did not alter CD8<sup>+</sup> T cell infiltration (**Fig. 5a-b**). Ectopic *Kit* expression in PSP cells brought  
298 the level of CD8<sup>+</sup> T cells back to that of PS tumors. The CD8<sup>+</sup>-T/T<sub>reg</sub> ratio increased after *Kit*  
299 knockdown in PS and decreased when *Kit* expression was restored in PSP (**Fig. 5a-b**). *Kit*  
300 expression on the tumor cell surface was confirmed using flow cytometry of freshly isolated  
301 tumors (**Fig. 5c**). By comparing PS-OVA and PSP-OVA with their respective *Kit*-knockdown

302 sublines for OT-I T cell killing, we found that Kit silencing sensitized PS-OVA, but not PSP-OVA,  
303 to killing (**Fig. 5d-e**). Consistent with the critical role of p53 in Pygo2-Kit regulation, when  
304 Pten/Smad4/p53 and Pten/Smad4/p53/Pygo2 tumors were compared, the T cell subsets showed  
305 no differences (**Extended Data Fig. 5a**). These results indicate that Kit is the critical downstream  
306 mediator for Pygo2 to evade the anti-tumor effect from CTLs.

307 The Kit-Ido1 axis plays an important role in cancer cell-induced CTL dysregulation in GIST  
308 through producing immunosuppressive metabolites of tryptophan (Trp)<sup>39</sup>. In PCa models, Kit and  
309 Ido1 shared the same expression pattern (**Fig. 3e, 3g, 4d**). We used mass spectrometry to  
310 quantify the relative abundances of Trp and the metabolite kynurenine (Kyn) in pDKO and pTKO  
311 tumor lysates. Although Trp levels showed no difference, Kyn and Kyn/Trp ratios were  
312 significantly lower in pTKO tumors (**Fig. 5f**). The Kyn/Trp ratio was also much higher in the lysate  
313 and medium of PS-OVA than PSP-OVA cells (**Fig. 5g**). Ido1 inhibitor 1-methyltryptophan (1-MT)  
314 enhanced OT-I T cell killing of PS cells (**Extended Data Fig. 5b**). To target the Kit-Ido1 axis *in*  
315 *vivo*, we treated mice bearing PS or PSP syngeneic tumors with imatinib or 1-MT and observed  
316 that both inhibitors significantly impeded PS tumors but not PSP tumors (**Fig. 5h-i**). At the TME  
317 level, imatinib and 1-MT treatments of PS tumors increased CD8<sup>+</sup> and CD4<sup>+</sup> T cells and  
318 decreased the T<sub>reg</sub> fraction of CD4<sup>+</sup> T cells (**Extended Data Fig. 5c**). However, CD8<sup>+</sup> T cell  
319 infiltration was unaltered by the treatments in PSP tumors (**Extended Data Fig. 5d**). In conclusion,  
320 Kit-Ido1 cascade is the underlying mechanism for Pygo2-mediated CTL exclusion in PCa.

321

### 322 **Deletion of Pygo2 enhances efficacy from ICB, adoptive T cell therapy and CXCR2 inhibitor**

323 Since Pygo2 extinction in PCa cells stimulated CTL infiltration *in vivo* and enhanced OT-I T-cell  
324 killing *in vitro*, Pygo2 ablation may enhance the efficacy of immunotherapies. We tested this  
325 hypothesis in different therapeutic contexts. To investigate the effect of Pygo2 knockout on ICB  
326 therapy, tumor-bearing C57BL/6 mice injected with RM9 control or Pygo2-knockout sublines were  
327 treated with isotype IgG or ICB antibodies (anti-PD1 plus anti-CTLA4). ICB decelerated but failed  
328 to eradicate any tumors. Pygo2 knockout led to 50% remission. Strikingly, the combination of ICB  
329 and Pygo2 knockout eliminated all RM9 tumors (**Fig. 6a-b**). In an ACT immunotherapy setting,  
330 stimulated OT-I CD8<sup>+</sup> cells were infused into mice bearing tumors formed by OVA-expressed  
331 RM9 control or Pygo2 knockout sublines. A single dose of ACT slowed down Pygo2-knockout-  
332 OVA tumors more dramatically than control-OVA tumors (**Fig. 6c**). The ACT experiment was  
333 conducted in nude mice that lack T cells; therefore, the tumor-infiltrating CD8<sup>+</sup> T cells should  
334 represent the infused OT-I CTLs. We observed a 4-fold higher CD8<sup>+</sup> T cell infiltration in Pygo2-

335 knockout-OVA tumors than in control-OVA tumors (**Fig. 6d**). Therefore, targeting Pygo2 has the  
336 potential to enhance both ICB and ACT immunotherapies in PCa.

337 PMN-MDSCs constitute a formidable barrier to anti-tumor T cell immunity in PCa. Blocking  
338 CXCR2 attenuated PMN-MDSC infiltration and decelerated pDKO tumor progression<sup>15</sup>. Pygo2  
339 loss in PCa cells did not affect PMN-MDSC abundance (**Extended Data Fig.2a**) or their  
340 immunosuppressive ability (**Extended Data Fig.6a**). Therefore, Pygo2-controlled and PMN-  
341 MDSC-mediated immunosuppressions were distinct, prompting a co-targeting strategy. CXCR1/2  
342 antagonist SX-682 reduced PMN-MDSC infiltration in PCa<sup>49</sup>, and the combination of SX-682 and  
343 anti-PD1 therapy are under evaluation in clinical trials (NCT03161431, NCT04599140). We  
344 induced spontaneous prostate tumors in nDKO<sup>Luc</sup> and nTKO<sup>Luc</sup> mice with tamoxifen, followed by  
345 administration of SX-682 medicated chow. SX-682-fed mice contained substantial SX-682 in  
346 circulation (**Extended Data Fig.6b**). Quantification of tumor volume with MRI indicated that  
347 although SX-682 was not as strong as Pygo2 loss to attenuate Pten/Smad4 tumor progression,  
348 nTKO<sup>Luc</sup> mice fed the SX-682 diet developed the smallest tumors (**Fig. 6e**). Concordantly, SX-  
349 682-treated nTKO<sup>Luc</sup> mice showed the most extended survival (**Fig. 6f**). SX-682 significantly  
350 reduced PMN-MDSCs and increased CD8<sup>+</sup> T cells in the TME of nDKO<sup>Luc</sup> and nTKO<sup>Luc</sup> tumors  
351 (**Fig. 6g**). Although SX-682 did not affect the infiltration of total CD4<sup>+</sup> T cells (**Extended Data Fig.**  
352 **6c**), SX-682 significantly downregulated the fraction of T<sub>reg</sub> in CD4<sup>+</sup> T cells (**Fig. 6g**), which should  
353 also contribute to the overall reduced immunosuppression in the TME. In conclusion, Pygo2  
354 extinction in PCa cells and PMN-MDSC blockade by targeting CXCR2 signaling alter the TME  
355 through complementary mechanisms, together eliciting stronger anti-tumor immunity.

356

### 357 **Pygo2 inhibitors antagonize PCa progression and enhance immunotherapy**

358 Ali et al. identified a Pygo2 small-molecule inhibitor, JBC117, based on virtual screening for  
359 agents targeting the PHD domain of Pygo2, and showed the anti-tumor effect of JBC117 on colon  
360 and lung cancer xenografts<sup>50</sup>. It was unclear whether the anti-tumor activity of JBC117 was  
361 dependent on Pygo2 expression. Here, we synthesized JBC117 and its analog JBC117ana,  
362 which lacks one hydroxyl group (**Fig. 7a, Extended Data Fig.7a-b**). The ability of JBC117 and  
363 JBC117ana to interrupt Pygo2 binding with H3K4me2 was verified by enzyme-linked  
364 immunosorbent assay (ELISA) (**Extended Data Fig.7c-e**). PS and PSP syngeneic tumors were  
365 treated with JBC117 or JBC117ana, and only the PS tumors were attenuated (**Fig. 7b-c**),  
366 supporting the on-target activity of JBC117. JBC117 or JBC117ana attenuated Kit and Ido1  
367 expression in PS tumors but not in PSP tumors (**Fig. 7d**). We tested whether Pygo2 inhibitors  
368 sensitized PCa to immunotherapy. In the RM9 model, ICB and JBC117 exhibited single-agent

369 anti-tumor activity, but the combination showed significantly more potent efficacy (**Fig. 7e**).  
370 Infiltration of CD8<sup>+</sup> T cells, but not CD4<sup>+</sup> T cells, was increased significantly by ICB or JBC117  
371 treatment, and JBC117 enhanced the ability of ICB to downregulate T<sub>reg</sub> (**Fig. 7f**).

372 To explore the correlation between PYGO2 and CTL infiltration in human PCa, we  
373 performed GSEA of the CTL gene signature (**Supplementary Table 7**) on several transcriptome  
374 datasets of primary or metastatic human PCa<sup>43,44,51</sup>. The CTL signature was enriched in patient  
375 samples with low *PYGO2* expression (**Fig. 7g**). Experimentally, immunofluorescence staining for  
376 *PYGO2* and CD8 in archived samples of human primary PCa was performed (**Fig. 7h**). *PYGO2*  
377 expression appeared heterogeneous in the tumor areas of some tumor samples, possibly due to  
378 the histological heterogeneity of human PCa. Therefore, we classified the samples into group A,  
379 composed of more homogeneous *PYGO2* staining, and group B, composed of more  
380 heterogeneous *PYGO2* expression. In Group A, samples with higher *PYGO2* expression  
381 contained significantly fewer CD8<sup>+</sup> T cells, whereas in Group B, tumor areas with higher *PYGO2*  
382 expression also showed much lower CD8<sup>+</sup> T cell infiltration (**Fig. 7i**). Therefore, clinical evidence  
383 supports the role of *PYGO2* in excluding CTL infiltration.

## 384 DISCUSSION

385 A combinatorial approach that fosters a TME conducive to immunotherapy is likely  
386 required to treat advanced PCa effectively. Recent studies highlighted the potential of sensitizing  
387 PCa to ICB therapy by inhibiting immunosuppressive myeloid cells, especially PMN-MDSCs,  
388 using CXCR1/2 antagonists, IL-23 blockade, and kinase inhibitors such as cabozantinib <sup>52</sup>.  
389 Another powerful approach is to target cancer-cell-intrinsic mechanisms that simultaneously  
390 control cancer cell malignant functions and the formation of an immunosuppressive TME <sup>12,13</sup>.  
391 This second approach has not been investigated in PCa. Here, we show that Pygo2, a PCa  
392 oncoprotein encoded by the 1q21.3 amplicon, initiates a signaling cascade that involves p53, Sp1,  
393 Kit, and Ido1 to reduce CTL infiltration and promote T<sub>reg</sub> infiltration in the TME of PCa (**Fig. 7j**).  
394 Expression ablation or pharmacological inhibition of Pygo2 not only generated single-agent anti-  
395 tumor activity and prolonged the survival of PCa-bearing animals but also significantly enhanced  
396 the efficacy of ICB and ACT therapies. This newly revealed function of Pygo2, in addition to the  
397 cell-autonomous function of Pygo2 in promoting PCa cell proliferation <sup>17,30</sup>, strongly supports the  
398 clinical development of Pygo2 inhibitors as a new avenue for the treatment of PCa and possibly  
399 other malignancies with high Pygo2 expression <sup>19-21,23-25</sup>.

400 Previous studies focused on the cell-autonomous function of Pygo2 in cancer cell  
401 proliferation and stemness. Our study elucidates a Pygo2-controlled signaling axis that fosters a  
402 metabolically immunosuppressive TME in which CTL infiltration and activity are constrained. This  
403 finding echoes the therapeutically relevant theme that various oncogenic pathways play master  
404 regulatory roles in shaping the tumor immune landscape and dictating tumor resistance to  
405 immunotherapy <sup>12,13</sup>. Consequently, pharmacological inhibition of Pygo2 can have two effects:  
406 thwarting tumor cell proliferation and enhancing CTL infiltration and activity. Because the histone  
407 code reader function of Pygo2 through binding between the PHD domain and H3K4me2/3 is  
408 required for Pygo2 to promote Kit expression (**Fig. 4i**), pharmacological targeting the PHD domain  
409 is a valid approach to diminish the revealed signaling mechanism.

410 Although the reader function of Pygo2 through binding to H3K4me2/3 appears invariant in  
411 Pygo2-involved gene regulation, the co-factors interacting with Pygo2 vary in a context-dependent  
412 manner. Pygo2 formed a complex with CBP/p300 and p53 (**Extended Data Fig. 4e-f**), and loss  
413 of Pygo2 reduced p53 acetylation, phosphorylation, and transcriptional activity (**Fig. 4e-f**). This  
414 result is consistent with the function of Pygo2 in inducing p53 accumulation and acetylation in hair  
415 follicle early progenitor cells <sup>28</sup>. However, Pygo2-p53 regulation in the hair follicle context  
416 depended on  $\beta$ -catenin activation, whereas Pygo2 promoted the p53/Sp1/Kit/Ido1 axis in PCa  
417 cells independent of canonical Wnt/ $\beta$ -catenin signaling. This mechanism provides an example of

418 the Wnt/ $\beta$ -catenin-independent mechanism of Pygo2 action, suggesting that the therapeutic  
419 inhibition of canonical Wnt signaling will not abolish the tumorigenic activity of Pygo2.

420 Both mouse and human PCa genetic data suggest p53 dependence of Pygo2 function  
421 (**Fig. 4c, 4g-h**). This result adds to the known complexity of p53 function in cancer progression  
422 <sup>53,54</sup>. Pten/p53 mice developed PCa more rapidly than *PB-Cre4<sup>+</sup> Pten<sup>L/L</sup>* mice due to removing  
423 the p53-dependent cellular senescence <sup>55</sup>. However, this tumor suppressor function of p53 was  
424 not manifested in the Pten/Smad4 background because the median survival for pDKO  
425 (Pten/Smad4) and Pten/Smad4/p53 mice was 16.4 and 17.9 weeks, respectively (**Fig. 1d, 4c**).  
426 This may be explained by the convergent function of p53 and TGF $\beta$ /Smad signaling to restrict  
427 early tumorigenesis <sup>56</sup>. The p53 activity regulated by Pygo2 is insufficient to cause cell cycle arrest  
428 or apoptosis, and Pygo2 does not participate in p53-dependent cell cycle regulation.

429 Our results showed the co-occupancy of Pygo2 and p53 to the *Sp1* promoter (**Fig. 4j-k**).  
430 Previous studies using ChIP-seq identified Sp1 as a direct target and signaling intermediate  
431 effector of p53 <sup>57,58</sup>. Our finding of Sp1 binding to the *Kit* promoter region (**Fig. 4m**) is consistent  
432 with reports showing the recruitment of Sp1 to the G-quadruplex-forming sites in the *KIT* promoter  
433 <sup>59</sup>. More work is needed to identify the components of the TF complexes that control Sp1 and Kit  
434 expression in a Pygo2-dependent manner. It should be noted that Pygo2 may modulate  
435 immunosuppression through mechanisms in addition to the Kit/Ido1 pathway because PCa cells  
436 in pTKO mice were also enriched for innate immune pathways, such as interferon- $\alpha$  response,  
437 interferon- $\gamma$  response, and JAK/STAT signaling (**Fig. 3b**). Our follow-up studies investigating  
438 other Pygo2 immune-modulatory mechanisms will help provide a complete picture. Because  
439 Pygo2 function in immunosuppression may go beyond the Kit/Ido1 pathway, it is reasonable to  
440 believe that targeting Pygo2 is more effective than inhibiting Kit or Ido1 in treating human PCa.

441 A significant contribution of this study is the translational implications. First, through  
442 genetic ablation of Pygo2, we demonstrated that all three immunotherapy approaches (ICB, ACT,  
443 and CXCR2 inhibitor) were significantly enhanced when Pygo2 was co-targeted (**Fig. 6**). Second,  
444 we synthesized JBC117 and JBC117ana as prototype Pygo2 inhibitors and showed that they  
445 largely phenocopied Pygo2 genetic deletion to generate both single-agent and combinatorial  
446 efficacy with ICB (**Fig. 7**). Nevertheless, the potency of JBC117 and JBC117ana to inhibit Pygo2-  
447 H3K3me2 interaction was moderate (**Extended Data Fig.7e**), prompting ongoing studies in our  
448 laboratory to perform virtual screening followed by ELISA-based validation to identify Pygo2  
449 inhibitors with better drug-like properties.



## 450 **METHODS**

### 451 **Mice**

452 All animal work performed in this study was approved by the Institutional Animal Care and  
453 Use Committee at University of Notre Dame. All animals were maintained under pathogen-free  
454 conditions and cared for in accordance with the International Association for Assessment and  
455 Accreditation of Laboratory Animal Care policies and certification. *PB-Cre4*, *Pten<sup>L/L</sup>*, *Smad4<sup>L/L</sup>*,  
456 *p53<sup>L/L</sup>*, and *Rosa26-LSL-Luc<sup>L/L</sup>* alleles have been previously described<sup>49</sup>. *Pygo2<sup>L/L</sup>* allele has been  
457 previously reported<sup>32</sup>. *Nkx3.1<sup>CreERT2</sup>* allele was obtained from the NCI mouse repository (strain  
458 number 01XBQ). All GEM mouse models were backcrossed to a C57BL/6 background for at least  
459 four generations. C57BL/6J (RRID: IMSR\_JAX:000664) and OT-I (C57BL/6-Tg  
460 (TcraTcrb)1100Mjb/J, RRID: IMSR\_JAX:003831) mice were purchased from Jackson Laboratory.  
461 Nude mice (RRID: IMSR\_TAC:ncrnu) were purchased from Taconics.

462

### 463 **Cell Lines**

464 TS3132 was previously isolated from *Pten/Smad4* mice on a mixed background<sup>33</sup> and  
465 cultured in DMEM (GE Healthcare, SH30243.FS) supplemented with 10% fetal bovine serum  
466 (FBS, GE Healthcare, SH30396.03) and 100U/ml penicillin-streptomycin (Caisson Labs, PSL01).  
467 PS and PSP cell lines were established in this study from pDKO and pTKO tumors, respectively,  
468 and cultured in an optimized mouse prostate primary cell medium composed of DMEM/F12 (VWR,  
469 45000-344), 10% FBS, 100U/ml penicillin-streptomycin, 10ng/ml EGF (Sigma-Aldrich, E4127),  
470 20µg/ml adenine (Sigma-Aldrich, A3159), 15mM HEPES (VWR, 16777-032), 5µg/ml insulin  
471 (Sigma-Aldrich, I-1882), 0.32µg/ml hydrocortisone (Sigma-Aldrich, H0888), and 10µM Y-27632  
472 (ApexBio, B1293). PPS and PPSP cell lines established in this study were derived from prostate  
473 tumors of *Pten/Smad4/p53* and *Pten/Smad4/p53/Pygo2*, respectively, and cultured in DMEM  
474 supplemented with 10% FBS and 100U/ml penicillin-streptomycin. All genotypes of these newly  
475 established cell lines were verified by genotyping. RM9 was purchased from ATCC (CRL-3312,  
476 RRID: CVCL\_B461) and cultured in DMEM/F12 supplemented with 10% FBS and 100U/ml  
477 penicillin-streptomycin. All the cell lines were cultured at 37°C in a humidified incubator with 5%  
478 CO<sub>2</sub>. All cells were tested for mycoplasma-free status using a Mycoplasma Assay Kit (Agilent  
479 Technologies, 302109).

480

### 481 **Animal Experiments**

482 For tamoxifen-inducible PCa models, nDKO<sup>Luc</sup> and nTKO<sup>Luc</sup> mice between 1-5 months  
483 were intraperitoneally (i. p.) injected with tamoxifen (Sigma-Aldrich, T5648) at 1mg in 100µl corn

484 oil for 5 consecutive days to induce Cre activity and tumorigenesis. For SX-682 treatment  
485 experiments, nDKO<sup>Luc</sup> mice 4-6 weeks post-tamoxifen and nTKO<sup>Luc</sup> mice 8-10 weeks post-  
486 tamoxifen had similar tumor volumes; thus, they were fed with SX-682 medicated chow (Syntrix  
487 Pharmaceuticals) prepared at 1428.5 mg/kg (equivalent to 200 mg/kg mouse body weight/day)  
488 until the survival endpoint.

489 For syngeneic or allogenic primary tumor experiments,  $1 \times 10^6$  tumor cells were injected  
490 subcutaneously into C57BL/6 or nude male mice. For experimental metastasis experiments,  
491  $2 \times 10^5$  tumor cells were injected intracardially into nude male mice. Metastatic tumors were  
492 monitored by bioluminescence imaging at the indicated time points. Mice were sacrificed eight  
493 weeks post-injection for necropsy.

494 For CD8<sup>+</sup> T cell depletion experiments, mice with tumors reaching 50-100 mm<sup>3</sup> were  
495 randomized to receive i.p. injection of an initial 400µg followed by 200µg anti-CD8 (BioXCell,  
496 BE0061) twice weekly or an equivalent dose of isotype IgG control. For targeted therapeutic  
497 experiments, mice with tumors reaching 50-100 mm<sup>3</sup> were randomized to receive the following  
498 therapies at the reported doses: imatinib (MedChem Express. HY-50946) at 50 mg/kg, i.p.,  
499 twice/day<sup>39</sup>, 1-MT (Sigma-Aldrich, 452483) at 400 mg/kg, oral, twice/day<sup>39</sup>, JBC117, and  
500 JBC117ana (synthesized in-house, see below) at 20 mg/kg, subcutaneously, daily<sup>50</sup>. For ICB  
501 therapy using the RM9 model,  $2 \times 10^6$  RM9 sublines were inoculated into both the flanks of  
502 C57BL/6 male mice. Three days after inoculation, the mice were treated with anti-PD1 (BioLegend,  
503 114116) and anti-CTLA4 (BioLegend, 106207) at 10mg/kg each, i.p., twice a week, or an  
504 equivalent dose of isotype IgG control. All treatments were continued until the specified  
505 experimental endpoints were reached.

506

### 507 **Adoptive OT-I T Cell Transfer**

508 Splenocytes were isolated from the spleen of 6-10-week-old OT-I male mice and pulsed  
509 with 2ug/ml of OVA peptide SIINFEKL (VWR, H-4866.0001BA) for 4 h in T cell culture media  
510 composed of RPMI1640 (GE Healthcare, SH30027.01) supplemented with 10% FBS, 100U/ml  
511 penicillin-streptomycin, and 50µM 2-mercaptoethanol (VWR, 97064-880). Splenocytes were  
512 washed three times with PBS and seeded  $1 \times 10^7$  cells/well in 6-well plates. Cells were propagated  
513 every 1-2 days and T cells proliferated to form clusters. After 3-5 days, T cells were washed three  
514 times with PBS, and  $1 \times 10^7$  cells in 100ul PBS were intravenously injected into nude mice  
515 inoculated with RM9 sublines 3 days before. Tumor-bearing mice were monitored until the  
516 specified endpoint.

517

## 518 **Non-invasive Animal Imaging**

519 MRI imaging with 1T ICON (Bruker) and bioluminescence imaging with a Spectral Ami HT  
520 Advanced Molecular Imager (Spectral Instruments Imaging) were performed at the Notre Dame  
521 Integrated Imaging Facility, following our previous report <sup>49</sup>. MRI image sequences were loaded  
522 into ImageJ (RRID: SCR\_003070) to manually demarcate the contour of the prostate on each  
523 plane and to calculate the total volume by integration.

524

## 525 **SX-682 Measurement in Mice Plasma**

526 Plasma was isolated from the peripheral blood of mice treated with the standard or SX-  
527 682 diet (Syntrix Pharmaceuticals) for one month. The calibration sample was prepared by diluting  
528 a stock solution containing a known amount of SX-682 in C57BL/6 mouse plasma. A 20ul aliquot  
529 of each sample was then diluted 1/4 into an internal standard solution (acetonitrile + 50 ng/ml SX-  
530 517). The resulting suspension was briefly vortexed and centrifuged at 10,000 rpm for 10 min.  
531 The supernatants were then transferred to HPLC vials for analysis. The peak areas for SX-682  
532 were integrated, and the SX-682 concentrations were calculated using a formula derived from the  
533 calibration curve.

534

## 535 **Immunohistochemistry (IHC), Immunofluorescence (IF), and Western Blot**

536 Animal tissues were fixed overnight in 10% formalin and embedded in paraffin. IHC and  
537 IF staining were performed as previously described <sup>49</sup>. Antigen retrieval was performed by heating  
538 in a pressure cooker at 95°C for 30 min, followed by 115°C for 1 min in citrate-unmasking buffer  
539 (pH 6.0). The IHC slides were scanned using an Aperio ScanScope (Leica). For IF staining of  
540 human FFPE specimens, the tumor areas were demarcated based on pathological inspection of  
541 H&E staining. IF slides were imaged with an A1R confocal laser microscope (Nikon), and CD8<sup>+</sup> T  
542 cells were counted manually. Primary antibodies used included Pygo2 (clone S3I4, previously  
543 reported <sup>30</sup>), Ki67 (Fisher Scientific, RM-9106-S1), cleaved caspase 3 (Cell Signaling Technology,  
544 9661), Kit (Cell Signaling Technology, 3074), Ido1 (Santa Cruz Biotechnology, sc137012), CD3  
545 (DAKO, A0452),  $\beta$ -catenin (Cell Signaling Technology, 8480), mouse CD8a (Cell Signaling  
546 Technology, 98941), and human CD8a (Biolegend, 372902).

547 For western blot, cells or fresh tissues were lysed on ice using RIPA buffer supplemented  
548 with protease inhibitors (Bimake, B14012) and phosphatase inhibitors (Roche, 04906845001).  
549 Immunoblotting was performed as described previously <sup>49</sup>. The following primary antibodies were  
550 used: Pygo2 (clone S3I4),  $\beta$ -actin (Santa Cruz Biotechnology, sc-47778), kit (Santa Cruz  
551 Biotechnology, sc-13508), Erk (Cell Signaling Technology, 4695), phospho-Erk1/2 (Cell Signaling

552 Technology, 4370), p53 (Cell Signaling Technology, 2524), Akt (Cell Signaling Technology, 2920),  
553 phospho-Akt (Cell Signaling Technology, 4060), Ido1 (Santa Cruz Biotechnology, sc137012),  
554 CBP (Cell Signaling Technology, 7389), phospho-p53 (Cell Signaling Technology, 9284), acetyl-  
555 p53 (Cell Signaling Technology, 2525), and Sp1 (Santa Cruz Biotechnology, sc-420).

556

### 557 **CyTOF and Flow Cytometry for Intratumoral Immunocytes**

558 Tumors were minced into homogenate and rotated at 37°C in dissociation media, DMEM  
559 with 10% FBS and 1 mg/ml collagenase IV (STEMCELL Technologies, 07427) for 1 h, followed  
560 by passing through 40µm strainers. Erythrocytes were depleted via hypotonic lysis. The CyTOF  
561 procedure and antibody panel have been described previously<sup>15</sup>. The samples were analyzed  
562 with Helios CyTOF mass cytometer (Fluidigm) in the Flow Cytometry and Cellular Imaging Core  
563 Facility at the MD Anderson Cancer Center. Flow cytometry samples were prepared as described  
564 previously<sup>49</sup> and run on CytoFLEX S (Beckman Coulter). CyTOF and flow cytometry data were  
565 analyzed using FlowJo v10.8 (FlowJo, RRID: SCR\_008520) or CytExpert (Beckman Coulter).  
566 Fluorochrome-conjugated antibodies included CD8a (Tonbo Biosciences, 65-0081), CD4 (Tonbo  
567 Biosciences, 35-0042), Foxp3 (Tonbo Biosciences, 20-5773), CD3 (Tonbo Biosciences, 25-0032),  
568 CD45 (Tonbo Biosciences, 60-0451), CD45 (Tonbo Biosciences, 35-0451), CD11b (Tonbo  
569 Biosciences, 65-0112), Gr-1 (Tonbo Biosciences, 60-5931), F4/80 (Tonbo Biosciences, 25-4801),  
570 kit (Tonbo Biosciences, 20-1172), and EpCAM (BioLegend, 118215).

571

### 572 **T Cell-PMN-MDSC Co-culture Assay and T Cell Killing Assay**

573 T cell and PMN-MDSC co-culture assays were used to assess the immunosuppressive  
574 activity of PMN-MDSCs following our previous method<sup>49</sup>. CD3<sup>+</sup> T cells were isolated from the  
575 spleens of wild-type C57BL/6 mice, whereas PMN-MDSCs were isolated from nDKO<sup>Luc</sup> and  
576 nTKO<sup>Luc</sup> tumors. PMN-MDSCs and T cells were co-cultured in a 2:1 ratio. For the antigen-  
577 dependent T-cell killing assay, OVA-overexpressing cancer cells were seeded at 5,000 cells/well  
578 in 96-well plates. After the cells were attached to the plate, OT-I T cells stimulated in the same  
579 manner as in the ACT experiment (see above) were added to the cancer cells at the specified  
580 E:T ratios. After 24-48h of co-culture, T cells were washed away and viable cancer cells were  
581 measured using the resazurin assay.

582

### 583 **Tumor Cell Proliferation Assays**

584 For the 2D colony formation assay, cancer cells were seeded at 100/well into 24-well  
585 plates and cultured for 5-7 days before fixation and crystal violet staining. The colonies were

586 counted manually. For the 3D spheroid assay, cancer cells at a density of 2,000/10 $\mu$ l culture  
587 media were mixed with 20 $\mu$ l Matrigel (Corning, 354230), then dropped to the center of the wells  
588 of a 24-well plate, followed by flipping over the plate and incubation for 15-30 min at 37°C. The  
589 plate was flipped back, and prewarmed mouse prostate primary cell medium (see recipe above)  
590 was added. Spheroids were formed within 5-7 days and imaged for manual counting.

591

### 592 **Cell Migration Assay**

593 Cells were seeded at 5x10<sup>5</sup> cells in 200 $\mu$ l serum-free DMEM in the upper chamber of the  
594 inserts (Celltreat, 230639). DMSO or imatinib (4 $\mu$ M) was then added to the cells. The inserts were  
595 placed in 24-well plates containing DMEM with 10% FBS as chemoattractant. After 24 h, cells  
596 were fixed and stained with crystal violet. Cells on the top of the insert membranes were wiped  
597 away, and cells at the bottom of the membranes were imaged and counted.

598

### 599 **Reporter Assay**

600 For the p53 reporter assay, PG13-Luc (Addgene, 16442) was transfected into PS and  
601 PSP cells with jetOPTIMUS (Polyplus, 101000051) followed by 10 $\mu$ M nutlin-3 (Cayman Chemical  
602 Company, 10004372), 500ng/ml CPT (Chem-Impex, 22069), or 2 $\mu$ M doxorubicin (LC  
603 Laboratories, D-4000) treatment for 24h. Luciferase activity was measured using a SpectraMax  
604 Gemini EM microplate reader (Molecular Devices).

605

### 606 **CRISPR/cas9, shRNA and Gene Overexpression**

607 To generate Pygo2 CRPSR/cas9-knockout cells, three different CRISPR/Cas9 sgRNA  
608 designs in an all-in-one lentiviral vector (ABM, 382541140595) were purchased. Lentivirus was  
609 packaged to infect target cells following a previous report<sup>15</sup>. After puromycin selection, single-cell  
610 clones were expanded and screened by western blot to validate the Pygo2 knockout. For shRNA  
611 knockdown, all lentiviral shRNA clones targeting *Sp1*, *Kit*, and non-targeting shRNA control were  
612 obtained from Sigma-Aldrich in the pLKO vector and were prepared as previously described<sup>15</sup>.  
613 Cell lines stably overexpressing E $\beta$ C (Addgene, 24312) were generated by sorting mCherry<sup>+</sup> cells.  
614 Mouse *Pygo2* and *Kit* were subcloned from the original vectors (OriGene Technologies,  
615 MR206368; Sino Biological, MG50530-CH) into the pMSCV-puro retroviral backbone (Addgene,  
616 68469). The HA tag was added to the Pygo2 C-terminus by adding the HA coding sequence to  
617 the PCR primer. Mouse Pygo2 mutants W351A and Y326A, corresponding to human PYGO2  
618 W352 and Y327, respectively, were generated using the Phusion Site-Directed Mutagenesis Kit  
619 (Thermo Fisher Scientific, F541). All stable cell lines were selected using 2 $\mu$ g/ml of puromycin

620 (Goldbio, P-600). For OVA overexpression, full-length OVA was subcloned from the original  
621 vector (Addgene, 64599) to the EF1a-FOXA1-P2A-Hygro lentiviral vector (Addgene, 120438) with  
622 FOXA1 replaced with OVA. Stable cells were selected using 200 $\mu$ g/ml hygromycin B.

623

#### 624 **Quantitative RT-PCR (qRT-PCR)**

625 RNA was isolated using the RNeasy Kit (Bio Basic, BS1361) and reverse transcribed  
626 using the All-in-One cDNA Synthesis Kit (Bimake, B24403). qRT-PCR was performed using  
627 SYBR Green qPCR Master Mix (Bimake, B21202). *Gapdh* was used for normalization. Student's  
628 t-test was performed based on the  $\Delta\Delta C_T$  values. Unless otherwise specified, n=3 biological  
629 replicates per group were used for all qRT-PCR experiments. Primer sequences are listed in  
630 **Supplementary Table 8**.

631

#### 632 **CUT&RUN Assay Followed by Sequencing or qPCR**

633 CUT&RUN experiments were conducted using 200,000 PS or PSP cells using the  
634 CUT&RUN assay kit (Cell Signaling Technology, 86652). Briefly, the cells were washed and  
635 bound to concanavalin A-coated magnetic beads. Next, permeabilized cells were incubated with  
636 IgG (Cell Signaling Technology, 66362), antibodies against H3K4me3 (Cell Signaling Technology,  
637 9751), Sp1 (Santa Cruz Biotechnology, sc-420), p53 (Cell Signaling Technology, 2524), or  
638 Pygo2 (clone S314) for 2h at 4°C with rotation. The cell-bead slurry was washed and incubated  
639 with protein A-MNase for 1h at 4°C with rotation. CaCl<sub>2</sub> was added to the cell-bead slurry to initiate  
640 protein A-MNase digestion, and the reaction was incubated at 4°C for 30 min. The reaction was  
641 stopped with stop buffer containing 50pg of spike-in DNA. Digested DNA was extracted and  
642 purified using DNA purification spin columns (Cell Signaling Technology, 14209). The input  
643 samples were sonicated for 12 min with a Covaris S220 Ultrasonicator System to obtain a  
644 fragment size between 150-300bp. For sequencing, we prepared a library using the SimpleChIP  
645 ChIP-seq DNA Library Prep Kit for Illumina (Cell Signaling Technology, 56795). The library was  
646 sequenced using MiSeq (Illumina) in the Genomic & Bioinformatics Core Facility at the University  
647 of Notre Dame. Data were analyzed using Galaxy (<https://usegalaxy.org/>). The reads were  
648 aligned to the mm10 reference genome. Peak calling was performed using MACS2 software. To  
649 validate individual binding, qPCR was performed using SYBR Green qPCR master mix (Bimake,  
650 B21202). The enrichment of the *Kit* and *Sp1* promoter regions was calculated relative to the IgG  
651 control. For *Sp1* promoter region, forward primer 5'-TAATTGGCTGTTCGTTACGTC-3'; reverse  
652 primer 5'-GGAGCAAGCTTCCTAAACCA-3'. For *Kit* promoter region, forward primer 5'-  
653 AGCGTCCTCTCCGA-3'; reverse primer 5'- CCGCAAGAAAAGGCTCT-3'.

654

## 655 **Microarray and Genomic Data Analysis**

656 Single cells from spontaneous prostate tumors of pDKO and pTKO mice were isolated by  
657 digesting the tumors with 10mg/ml of *Bacillus Licheniformis* protease (Creative Enzymes,  
658 NATE0633) and 0.2 mg/ml DNase I (Sigma-Aldrich, 10104159001) on ice for 40 min, followed by  
659 passing through 70µm cell strainers. Cancer cells were purified using the MojoSort Mouse  
660 CD326/EpCAM Selection Kit (BioLegend, 480141), followed by RNA extraction using RNeasy Kit  
661 (Qiagen). RNA samples were profiled on the Mouse Genome 430 2.0 Array (Affymetrix) at the  
662 Genomics Core Facility at the MD Anderson Cancer Center. The data were analyzed using  
663 Transcriptome Analysis Console (TAC) software (Thermo Fisher) to generate a list of differentially  
664 expressed genes with a fold-change cutoff of over 1.5-fold and P-value < 0.05. Pathway  
665 enrichment was performed using GSEA software (UC San Diego and Broad Institute,  
666 RRID:SCR\_003199). The transcription factor enrichment was performed using Enrichr (RRID:  
667 SCR\_001575). Upstream regulator prediction and gene regulation connections for Kit and Pygo2  
668 were conducted with Ingenuity Pathway Analysis (IPA) software (QIAGEN, RRID:SCR\_008653).

669 To analyze the correlation between PYGO2 expression and CTL gene signature using  
670 published human PCa transcriptomic data, we downloaded transcriptome data of three studies  
671 <sup>43,44,51</sup> from cBioPortal. For each dataset, the samples were grouped as high and low based on  
672 the normalized *PYGO2* level. Differential analyses between the PYGO2 high group and the  
673 PYGO2 low group were performed using limma<sup>60</sup>. Log<sub>2</sub>(fold change) of gene expression between  
674 the two groups was used to run GSEA of a CTL gene signature (Supplementary Table 7), curated  
675 based on Szabo et al<sup>61</sup>.

676

## 677 **Tryptophan and Kynurenine Detection**

678 To detect metabolites in prostate tumor tissues, 30mg of tissue was homogenized in 600µl  
679 dissolving solution (40:40:20 methanol: acetonitrile: water with 0.5% formic acid). The  
680 homogenate was centrifuged at 16,000 × g and 4°C for 10 min. The supernatant was collected,  
681 neutralized with 30ul of 15% NH<sub>4</sub>HCO<sub>3</sub>, and ready for detection. To detect metabolites in the  
682 cancer cells and conditioned medium, PS-OVA and PSP-OVA cell lines were first co-cultured with  
683 OVA-pulsed OT-I T cells at a 1:1 ratio for 24h. Cells were washed with cold PBS three times to  
684 remove T cells, and then 1ml dissolving solution was added and incubated on ice for 5 min,  
685 followed by adding 50ul 15% NH<sub>4</sub>HCO<sub>3</sub>. The cells were then scraped from the plate and  
686 transferred to a 1.5ml tube, followed by centrifugation at 16,000 × g at 4°C for 10 min. The  
687 supernatant was then collected for detection. For metabolite extraction from the conditioned

688 medium, after co-culture with T cells, the medium was collected and centrifuged at 1000 g for 5  
689 min and passed through a 0.22 $\mu$ m filter. From the medium, 50 $\mu$ l was transferred to a 1.5ml tube  
690 followed by adding 200 $\mu$ l ice-cold methanol and incubation at -20°C for 20 min. Next, the samples  
691 were centrifuged at 16,000  $\times$  g at 4°C for 10 min, and the supernatant was collected and set aside.  
692 The pellet was dissolved with 1ml dissolving solution without formic acid and incubated for 10 min  
693 on ice. After centrifugation at 16,000  $\times$  g at 4°C for 10 min, the supernatant was collected and  
694 combined with the methanol-extracted supernatant as the final sample for detection. To detect  
695 tryptophan and kynurenine, all samples were run on a Thermo Q-Exactive MS/MS coupled with  
696 a Thermo UPLC system at the Metabolomics Core Facility at the Rutgers-Robert Wood Johnson  
697 Medical School. The relative intensities of tryptophan and kynurenine were calculated by  
698 normalizing the intensity of the individual samples to the mean intensity of all samples.

699

## 700 **ELISA for Pygo2**

701 An ELISA for Pygo2 was designed by coating a streptavidin-coated 96-well plate (Thermo  
702 Fisher, 15125) with biotinylated 21-mer H3K4me2 peptide (Active Motif, 81041) at 0.5 $\mu$ g/ml of 2h,  
703 room temperature. Next, the wells were incubated with recombinant human PYGO2 (LSBio, LS-  
704 G26167) at 2 $\mu$ g/ml with compounds the test compounds (DMSO, JBC117, JBC117ana) at  
705 different concentrations. One hour later, free-floating rhPYGO2 was washed off. PYGO2 antibody  
706 (R&D, MAB3616) and HRP-conjugated secondary antibody were added sequentially, with  
707 washing between the steps. TMB substrate (BioLegend, 421101) was added after secondary  
708 antibody incubation for signal development detected at 450nm using an Epoch 2 microplate  
709 spectrophotometer (BioTek Instruments). If the compound interferes with PYGO2-H3K4me2  
710 binding, the reading at 450 nm is expected to be reduced.

711

## 712 **Co-Immunoprecipitation (Co-IP)**

713 PS Cells were extracted in IP buffer (25 mM Tris-HCl pH 7.4, 150mM NaCl, 1mM EDTA,  
714 1% NP-40 and 5% glycerol) supplemented with protease inhibitors (Bimake, Cat# B14012) and  
715 phosphatase inhibitors (Roche, Cat# 04906845001) and sonicated for 30 sec. The cell extracts  
716 were incubated with IgG (Cell Signaling Technology, 3900), p53 (Cell Signaling Technology,  
717 2524S), Pygo2 (S314), or CBP (Cell Signaling Technology, 7389) antibody at 1:200 dilution, 4°C  
718 overnight with rotation. Next, the samples were pulled down with protein A agarose beads (Cell  
719 Signaling Technology, 9863) and washed with 1x loading buffer for western blot detection.

720

## 721 **Proximity Ligation Assay (PLA)**



722 PLA was carried out on 4% paraformaldehyde-fixed PS and PSP cells using the Duolink  
723 PLA Kit (Sigma-Aldrich, DUO92101-1KT) following the manufacturer protocol. Pygo2 (S3I4) and  
724 p53 (Cell Signaling Technology, 2524) antibodies were used in this assay, rabbit IgG (Cell  
725 Signaling Technology, 3900) and mouse IgG (Santa Cruz Biotechnology, sc-2025) were used as  
726 control. The slides were imaged with an A1R confocal laser microscope (Nikon). The positive dots  
727 in cell nuclei were quantified manually.

728

## 729 **Clinical Samples**

730 Formalin-fixed paraffin-embedded (FFPE) slides of primary prostate tumors harvested by  
731 transurethral resection of the prostate (TURP) or radical prostatectomy were obtained from the  
732 tissue bank at the Indiana University School of Medicine. All specimens were de-identified. The  
733 experiments were approved by the IRB protocols of Indiana University School of Medicine  
734 (IRB#1808872882) and University of Notre Dame (20-03-5926). The clinical characteristics of the  
735 samples are summarized in **Supplementary Table 9**.

736

## 737 **JBC117 and JBC117ana Synthesis**

738 The putative Pygo2 small-molecule inhibitor, JBC117, was first discovered by Ali et al.<sup>50</sup>,  
739 but its synthesis method was not described. Our in-house syntheses of JBC117 and JBC117ana  
740 were conducted by the Warren Center for Drug Discovery and Development at the University of  
741 Notre Dame. The synthetic routes are illustrated in Extended Data Fig. 7a-b.

742 JBC117 was purified using a reverse-phase reverse phase Yamazen column (MPLC)  
743 using 30% acetonitrile: H<sub>2</sub>O (likely using a neutral mobile phase). The purity (>95%) of JBC117  
744 was determined using HPLC analysis. <sup>1</sup>H NMR (400 MHz, MeOD) δ 8.17 – 8.15 (m, 1H), 7.65  
745 (ddt, *J* = 7.9, 5.3, 2.4 Hz, 1H), 7.48 (dt, *J* = 8.2, 2.8 Hz, 1H), 7.41 (d, *J* = 8.5 Hz, 1H), 7.39 – 7.29  
746 (m, 3H), 7.07 (d, *J* = 14.8 Hz, 2H), 6.78 (dt, *J* = 8.1, 1.6 Hz, 1H), 5.19 (dt, *J* = 9.9, 3.4 Hz, 1H),  
747 4.84 (t, *J* = 6.4 Hz, 1H), 3.20 – 2.87 (m, 6H), 2.31 (d, *J* = 2.8 Hz, 3H), 2.21 – 2.09 (m, 2H), 2.02 –  
748 1.81 (m, 4H).; <sup>13</sup>C NMR (101 MHz, MeOD) δ 147.16, 137.44, 134.28, 130.81, 127.11, 125.90,  
749 125.41, 125.39, 124.89, 123.75, 121.66, 121.11, 120.28, 119.39, 118.48, 118.26, 116.56, 110.87,  
750 73.75, 64.94, 64.65, 62.25, 50.12, 49.99, 41.32, 35.44, 35.35, 33.23, 33.15, 20.42.; HRMS: Calcd.  
751 for C<sub>28</sub>H<sub>31</sub>N<sub>2</sub>O<sub>3</sub><sup>+</sup> [M+H]<sup>+</sup> 443.2319 found 427.2320.

752 JBC117ana was purified using a reverse-phase reverse phase Yamazen column (MPLC)  
753 using 30% acetonitrile: H<sub>2</sub>O (likely using a neutral mobile phase), followed by recrystallization.  
754 The purity of JBC117ana was determined by HPLC analysis (The compound was partially soluble  
755 and formed an eliminated product in the mobile phase system (AcCN: H<sub>2</sub>O and MeOH: H<sub>2</sub>O

756 containing 0.1%TFA). <sup>1</sup>H NMR (400 MHz, DMSO) δ 10.72 (s, 1H), 8.42 – 8.00 (m, 1H), 7.80 (dd,  
757 *J* = 7.2, 2.1 Hz, 1H), 7.55 – 7.41 (m, 3H), 7.36 (d, *J* = 8.4 Hz, 1H), 7.21 (d, *J* = 8.3 Hz, 1H), 7.14  
758 (d, *J* = 11.9 Hz, 2H), 6.80 (dd, *J* = 8.1, 1.5 Hz, 1H), 5.02 (s, 1H), 2.96 – 2.53 (m, 8H), 2.38 (s, 3H),  
759 1.95 – 1.67 (m, 6H). <sup>13</sup>C NMR (101 MHz, DMSO) δ 147.71, 137.33, 137.17, 133.35, 130.27,  
760 128.35, 127.86, 126.00, 125.63, 125.59, 124.31, 124.28, 121.92, 121.76, 121.43, 120.52, 119.55,  
761 119.38, 118.04, 115.64, 111.69, 111.63, 73.28, 65.70, 64.52, 50.28, 49.23, 34.51, 31.63, 21.88,  
762 21.72.; HRMS: Calcd. for C<sub>28</sub>H<sub>31</sub>N<sub>2</sub>O<sub>2</sub><sup>+</sup> [M+H]<sup>+</sup> 427.2384 found 427.2380.

763

## 764 **Statistical Analysis**

765 Statistical analyses were performed using GraphPad Prism v8.0 (RRID: SCR\_002798).  
766 Unless otherwise mentioned, all data are presented as mean ± SEM (standard error of the mean).  
767 Sample sizes, error bars, P values, and statistical methods are shown in the Figures. legends.  
768 Statistical significance was defined as P < 0.05.

769

## 770 **Data Availability**

771 Microarray data are available in the Gene Expression Omnibus (GEO) (RRID:  
772 SCR\_005012) with accession number GSE195948. CUT&RUN-seq data are available at GEO  
773 with accession number GSE196486. Other data generated in this study are available in the article  
774 and its data files. Further information and requests for resources and reagents should be directed  
775 towards lead contact.

776

## 777 **Author Contributions**

778 **Y. Zhu:** Conceptualization, investigation, methodology, data curation, formal analysis,  
779 validation, visualization, project administration, writing – original draft, writing – review & editing.  
780 **Y. Zhao:** investigation, methodology. **J. Wen:** investigation. **S. Liu:** software, visualization,  
781 formal analysis, writing – original draft. **T. Huang:** investigation. **I. Hatial:** resources,  
782 methodology, writing – original draft. **X. Peng:** investigation. **HA. Janabi:** investigation. **G.**  
783 **Huang:** investigation. **J. Mittlesteadt:** investigation. **M. Cheng:** resources. **B. Ashfeld:**  
784 resources. **A. Bhardwaj:** investigation. **KR. Kao:** resources. **DY. Maeda:** resources. **X. Dai:**  
785 resources. **O. Wiest:** supervision. **B. Blagg:** supervision. **Xuemin Lu:** supervision. **L. Cheng:**  
786 resources, data curation, supervision, funding acquisition. **J. Wan:** formal analysis, supervision,  
787 funding acquisition. **Xin Lu:** Conceptualization, investigation, resources, supervision, funding  
788 acquisition, writing – original draft, writing – review & editing.

789

790 **Acknowledgments**

791 We would like to thank the Lu lab members, Siyuan Zhang, Mary Ann McDowell, Jun Li, Crislyn  
792 D'Souza-Schorey, Zach Schafer, Sharon Stack, and Kasturi Haldar, for their essential comments  
793 and suggestions during this work. We are grateful for the support from various core facilities used  
794 in this study, including the Freimann Life Science Center (Teri Highbaugh), Genomics and  
795 Bioinformatics Core Facility (Michael Pfrender, Melissa Stephens, Jacqueline Lopez, Brent  
796 Harker), Integrated Imaging Facility (Sara Cole, Sarah Chapman), and Metabolomics Core  
797 Facility (Xiaoyang Su, Yujue Wang). This work was supported by the National Institutes of Health  
798 grant R01CA248033 (X. Lu). Other support included the Department of Defense CDMRP PCRP  
799 grants W81XWH2010312 (X. Lu) and W81XWH2010332 (X. Lu), Elsa U. Pardee Foundation  
800 grant (X. Lu), Indiana CTSI pilot grant (X. Lu) through NIH NCATS CTSA grant UL1TR002529 (A.  
801 Shekhar, PI), National Institutes of Health grant P30CA082709 (J. Wan), and Boler Family  
802 Foundation endowment (X. Lu) at University of Notre Dame.

## 803 REFERENCES

- 804 1 Waldman, A. D., Fritz, J. M. & Lenardo, M. J. A guide to cancer immunotherapy: from T  
805 cell basic science to clinical practice. *Nat Rev Immunol* **20**, 651-668,  
806 doi:10.1038/s41577-020-0306-5 (2020).
- 807 2 Hegde, P. S. & Chen, D. S. Top 10 Challenges in Cancer Immunotherapy. *Immunity* **52**,  
808 17-35, doi:10.1016/j.immuni.2019.12.011 (2020).
- 809 3 Kwon, E. D. *et al.* Ipilimumab versus placebo after radiotherapy in patients with  
810 metastatic castration-resistant prostate cancer that had progressed after docetaxel  
811 chemotherapy (CA184-043): a multicentre, randomised, double-blind, phase 3 trial. *The*  
812 *Lancet Oncology* **15**, 700-712 (2014).
- 813 4 Beer, T. M. *et al.* Randomized, Double-Blind, Phase III Trial of Ipilimumab Versus  
814 Placebo in Asymptomatic or Minimally Symptomatic Patients With Metastatic  
815 Chemotherapy-Naive Castration-Resistant Prostate Cancer. *Journal of Clinical Oncology*  
816 **35**, 40-47, doi:10.1200/jco.2016.69.1584 (2017).
- 817 5 Topalian, S. L. *et al.* Safety, activity, and immune correlates of anti-PD-1 antibody in  
818 cancer. *New England Journal of Medicine* **366**, 2443-2454,  
819 doi:10.1056/NEJMoa1200690 (2012).
- 820 6 Antonarakis, E. S. *et al.* Pembrolizumab for Treatment-Refractory Metastatic Castration-  
821 Resistant Prostate Cancer: Multicohort, Open-Label Phase II KEYNOTE-199 Study. *J*  
822 *Clin Oncol* **38**, 395-405, doi:10.1200/jco.19.01638 (2020).
- 823 7 Sharma, P. *et al.* Nivolumab plus ipilimumab for metastatic castration-resistant prostate  
824 cancer: preliminary analysis of patients in the CheckMate 650 trial. *Cancer cell* **38**, 489-  
825 499. e483 (2020).
- 826 8 Yuan, H. *et al.* Destructive impact of T-lymphocytes, NK and Mast cells on basal cell  
827 layers: implications for tumor invasion. *BMC Cancer* **13**, 258, doi:10.1186/1471-2407-13-  
828 258 (2013).
- 829 9 Flammiger, A. *et al.* Intratumoral T but not B lymphocytes are related to clinical outcome  
830 in prostate cancer. *APMIS* **120**, 901-908, doi:10.1111/j.1600-0463.2012.02924.x (2012).
- 831 10 Strasner, A. & Karin, M. Immune infiltration and prostate cancer. *Frontiers in Oncology* **5**,  
832 doi:10.3389/fonc.2015.00128 (2015).
- 833 11 Sharma, P., Hu-Lieskovan, S., Wargo, J. A. & Ribas, A. Primary, Adaptive, and Acquired  
834 Resistance to Cancer Immunotherapy. *Cell* **168**, 707-723, doi:10.1016/j.cell.2017.01.017  
835 (2017).
- 836 12 Spranger, S. & Gajewski, T. F. Impact of oncogenic pathways on evasion of antitumour  
837 immune responses. *Nat Rev Cancer* **18**, 139-147, doi:10.1038/nrc.2017.117 (2018).
- 838 13 Wellenstein, M. D. & de Visser, K. E. Cancer-Cell-Intrinsic Mechanisms Shaping the  
839 Tumor Immune Landscape. *Immunity* **48**, 399-416 (2018).
- 840 14 Spratt, D. E., Zumsteg, Z. S., Feng, F. Y. & Tomlins, S. A. Translational and clinical  
841 implications of the genetic landscape of prostate cancer. *Nat Rev Clin Oncol* **13**, 597-  
842 610, doi:10.1038/nrclinonc.2016.76 (2016).
- 843 15 Wang, G. *et al.* Targeting YAP-Dependent MDSC Infiltration Impairs Tumor Progression.  
844 *Cancer Discov* **6**, 80-95, doi:10.1158/2159-8290.cd-15-0224 (2016).
- 845 16 Bezzi, M. *et al.* Diverse genetic-driven immune landscapes dictate tumor progression  
846 through distinct mechanisms. *Nat Med* **24**, 165-175, doi:10.1038/nm.4463 (2018).
- 847 17 Lu, X. *et al.* An In Vivo Screen Identifies PYGO2 as a Driver for Metastatic Prostate  
848 Cancer. *Cancer Res* **78**, 3823-3833, doi:10.1158/0008-5472.can-17-3564 (2018).
- 849 18 Kao, K. R. *et al.* PYGOPUS2 expression in prostatic adenocarcinoma is a potential risk  
850 stratification marker for PSA progression following radical prostatectomy. *J Clin Pathol*,  
851 doi:10.1136/jclinpath-2017-204718 (2017).

- 852 19 Popadiuk, C. *et al.* Antisense suppression of pygopus2 results in growth arrest of  
853 epithelial ovarian cancer. *Clin Cancer Res* **12**, 2216 - 2223 (2006).
- 854 20 Andrews, P., Lake, B., Popadiuk, C. & Kao, K. Requirement of Pygopus 2 in breast  
855 cancer. *Int J Oncol* **30**, 357 - 363 (2007).
- 856 21 Tzenov, Y. R. *et al.* Human papilloma virus (HPV) E7-mediated attenuation of  
857 retinoblastoma (Rb) induces hPygopus2 expression via Elf-1 in cervical cancer. *Mol*  
858 *Cancer Res* **11**, 19-30, doi:10.1158/1541-7786.mcr-12-0510 (2013).
- 859 22 Zhang, S. *et al.* Pygopus-2 promotes invasion and metastasis of hepatic carcinoma cell  
860 by decreasing E-cadherin expression. *Oncotarget* **6**, 11074-11086,  
861 doi:10.18632/oncotarget.3570 (2015).
- 862 23 Liu, Y. *et al.* Abnormal expression of Pygopus 2 correlates with a malignant phenotype in  
863 human lung cancer. *BMC Cancer* **13**, doi:10.1186/1471-2407-13-346 (2013).
- 864 24 Talla, S. B. & Brembeck, F. H. The role of Pygo2 for Wnt/ $\beta$ -catenin signaling activity  
865 during intestinal tumor initiation and progression. *Oncotarget* **7**, 80612-80632,  
866 doi:10.18632/oncotarget.13016 (2016).
- 867 25 Zhou, C. *et al.* Pygo2 functions as a prognostic factor for glioma due to its up-regulation  
868 of H3K4me3 and promotion of MLL1/MLL2 complex recruitment. *Sci Rep* **6**, 22066,  
869 doi:10.1038/srep22066 (2016).
- 870 26 Fiedler, M. *et al.* Decoding of methylated histone H3 tail by the Pygo-BCL9 Wnt signaling  
871 complex. *Mol Cell* **30**, 507-518, doi:10.1016/j.molcel.2008.03.011 (2008).
- 872 27 Chen, J. *et al.* Pygo2 associates with MLL2 histone methyltransferase and GCN5  
873 histone acetyltransferase complexes to augment Wnt target gene expression and breast  
874 cancer stem-like cell expansion. *Molecular and cellular biology* **30**, 5621-5635,  
875 doi:10.1128/mcb.00465-10 (2010).
- 876 28 Sun, P. *et al.* Pygo2 regulates beta-catenin-induced activation of hair follicle  
877 stem/progenitor cells and skin hyperplasia. *Proc Natl Acad Sci U S A* **111**, 10215-10220,  
878 doi:10.1073/pnas.1311395111 (2014).
- 879 29 Gu, B., Watanabe, K., Sun, P., Fallahi, M. & Dai, X. Chromatin Effector Pygo2 Mediates  
880 Wnt-Notch Crosstalk to Suppress Luminal/Alveolar Potential of Mammary Stem and  
881 Basal Cells. *Cell Stem Cell* **13**, 48-61, doi:10.1016/j.stem.2013.04.012 (2013).
- 882 30 Andrews, P. G. P., Popadiuk, C., Belbin, T. J. & Kao, K. R. Augmentation of Myc-  
883 Dependent Mitotic Gene Expression by the Pygopus2 Chromatin Effector. *Cell Rep* **23**,  
884 1516-1529, doi:10.1016/j.celrep.2018.04.020 (2018).
- 885 31 Yang, L. *et al.* lncRNA-dependent mechanisms of androgen-receptor-regulated gene  
886 activation programs. *Nature* **500**, 598-602, doi:10.1038/nature12451 (2013).
- 887 32 Li, B. *et al.* Developmental phenotypes and reduced Wnt signaling in mice deficient for  
888 pygopus 2. *Genesis* **45**, 318-325, doi:10.1002/dvg.20299 (2007).
- 889 33 Ding, Z. *et al.* SMAD4-dependent barrier constrains prostate cancer growth and  
890 metastatic progression. *Nature* **470**, 269-273 (2011).
- 891 34 Zou, M. *et al.* Transdifferentiation as a Mechanism of Treatment Resistance in a Mouse  
892 Model of Castration-Resistant Prostate Cancer. *Cancer Discov* **7**, 736-749,  
893 doi:10.1158/2159-8290.cd-16-1174 (2017).
- 894 35 Lu, X. *et al.* VCAM-1 Promotes Osteolytic Expansion of Indolent Bone Micrometastasis  
895 of Breast Cancer by Engaging  $\alpha$ 4 $\beta$ 1-Positive Osteoclast Progenitors. *Cancer Cell* **20**,  
896 701-714 (2011).
- 897 36 Veglia, F., Sanseviero, E. & Gabrilovich, D. I. Myeloid-derived suppressor cells in the era  
898 of increasing myeloid cell diversity. *Nat Rev Immunol* **21**, 485-498, doi:10.1038/s41577-  
899 020-00490-y (2021).
- 900 37 Thompson, T. C., Southgate, J., Kitchener, G. & Land, H. Multistage carcinogenesis  
901 induced by ras and myc oncogenes in a reconstituted organ. *Cell* **56**, 917-930 (1989).

- 902 38 Adam, M., Potter, A. S. & Potter, S. S. Psychrophilic proteases dramatically reduce  
903 single-cell RNA-seq artifacts: a molecular atlas of kidney development. *Development*  
904 **144**, 3625-3632, doi:10.1242/dev.151142 (2017).
- 905 39 Balachandran, V. P. *et al.* Imatinib potentiates antitumor T cell responses in  
906 gastrointestinal stromal tumor through the inhibition of Ido. *Nat Med* **17**, 1094-1100,  
907 doi:10.1038/nm.2438 (2011).
- 908 40 Huang, T. *et al.* Effective combinatorial immunotherapy for penile squamous cell  
909 carcinoma. *Nat Commun* **11**, 2124, doi:10.1038/s41467-020-15980-9 (2020).
- 910 41 Andrews, P. G. & Kao, K. R. Wnt/ $\beta$ -catenin-dependent acetylation of Pygo2 by  
911 CBP/p300 histone acetyltransferase family members. *Biochem J* **473**, 4193-4203,  
912 doi:10.1042/bcj20160590 (2016).
- 913 42 Reed, S. M. & Quelle, D. E. p53 Acetylation: Regulation and Consequences. *Cancers*  
914 (*Basel*) **7**, 30-69, doi:10.3390/cancers7010030 (2014).
- 915 43 Abida, W. *et al.* Genomic correlates of clinical outcome in advanced prostate cancer.  
916 *Proc Natl Acad Sci U S A* **116**, 11428-11436, doi:10.1073/pnas.1902651116 (2019).
- 917 44 Abeshouse, A. *et al.* The Molecular Taxonomy of Primary Prostate Cancer. *Cell* **163**,  
918 1011-1025 (2015).
- 919 45 Gu, B. *et al.* Pygo2 expands mammary progenitor cells by facilitating histone H3 K4  
920 methylation. *J Cell Biol* **185**, 811-826, doi:10.1083/jcb.200810133 (2009).
- 921 46 Beishline, K. & Azizkhan-Clifford, J. Sp1 and the 'hallmarks of cancer'. *The FEBS journal*  
922 **282**, 224-258, doi:10.1111/febs.13148 (2015).
- 923 47 Maeda, K., Nishiyama, C., Ogawa, H. & Okumura, K. GATA2 and Sp1 positively  
924 regulate the c-kit promoter in mast cells. *J Immunol* **185**, 4252-4260,  
925 doi:10.4049/jimmunol.1001228 (2010).
- 926 48 Lécuyer, E. *et al.* The SCL complex regulates c-kit expression in hematopoietic cells  
927 through functional interaction with Sp1. *Blood* **100**, 2430-2440, doi:10.1182/blood-2002-  
928 02-0568 (2002).
- 929 49 Lu, X. *et al.* Effective combinatorial immunotherapy for castration-resistant prostate  
930 cancer. *Nature* **543**, 728-732, doi:10.1038/nature21676 (2017).
- 931 50 Ali, F., Yamaguchi, K., Fukuoka, M., Elhelaly, A. E. & Kuwata, K. Logical design of an  
932 anti-cancer agent targeting the plant homeodomain in Pygopus2. *Cancer Sci* **107**, 1321-  
933 1328, doi:10.1111/cas.12995 (2016).
- 934 51 Taylor, B. S. *et al.* Integrative Genomic Profiling of Human Prostate Cancer. *Cancer Cell*  
935 **18**, 11-22 (2010).
- 936 52 Lu, X. & Lu, X. Enhancing immune checkpoint blockade therapy of genitourinary  
937 malignancies by co-targeting PMN-MDSCs. *Biochim Biophys Acta Rev Cancer* **1877**,  
938 188702, doi:10.1016/j.bbcan.2022.188702 (2022).
- 939 53 Ghosh, M. *et al.* Mutant p53 suppresses innate immune signaling to promote  
940 tumorigenesis. *Cancer Cell* **39**, 494-508 e495, doi:10.1016/j.ccell.2021.01.003 (2021).
- 941 54 Blagih, J. *et al.* Cancer-Specific Loss of p53 Leads to a Modulation of Myeloid and T Cell  
942 Responses. *Cell Rep* **30**, 481-496 e486, doi:10.1016/j.celrep.2019.12.028 (2020).
- 943 55 Chen, Z. *et al.* Crucial role of p53-dependent cellular senescence in suppression of  
944 Pten-deficient tumorigenesis. *Nature* **436**, 725-730 (2005).
- 945 56 Dupont, S. *et al.* Convergence of p53 and TGF-beta signaling networks. *Cancer Lett*  
946 **213**, 129-138, doi:10.1016/j.canlet.2004.06.008 (2004).
- 947 57 Li, H. *et al.* Integrated high-throughput analysis identifies Sp1 as a crucial determinant of  
948 p53-mediated apoptosis. *Cell Death Differ* **21**, 1493-1502, doi:10.1038/cdd.2014.69  
949 (2014).
- 950 58 Nikulenkov, F. *et al.* Insights into p53 transcriptional function via genome-wide chromatin  
951 occupancy and gene expression analysis. *Cell Death Differ* **19**, 1992-2002,  
952 doi:10.1038/cdd.2012.89 (2012).

953 59 Da Ros, S. *et al.* G-Quadruplex Modulation of SP1 Functional Binding Sites at the KIT  
954 Proximal Promoter. *Int J Mol Sci* **22**, doi:10.3390/ijms22010329 (2020).  
955 60 Ritchie, M. E. *et al.* limma powers differential expression analyses for RNA-sequencing  
956 and microarray studies. *Nucleic acids research* **43**, e47, doi:10.1093/nar/gkv007 (2015).  
957 61 Szabo, P. A. *et al.* Single-cell transcriptomics of human T cells reveals tissue and  
958 activation signatures in health and disease. *Nat Commun* **10**, 4706, doi:10.1038/s41467-  
959 019-12464-3 (2019).  
960  
961

962 **FIGURES**

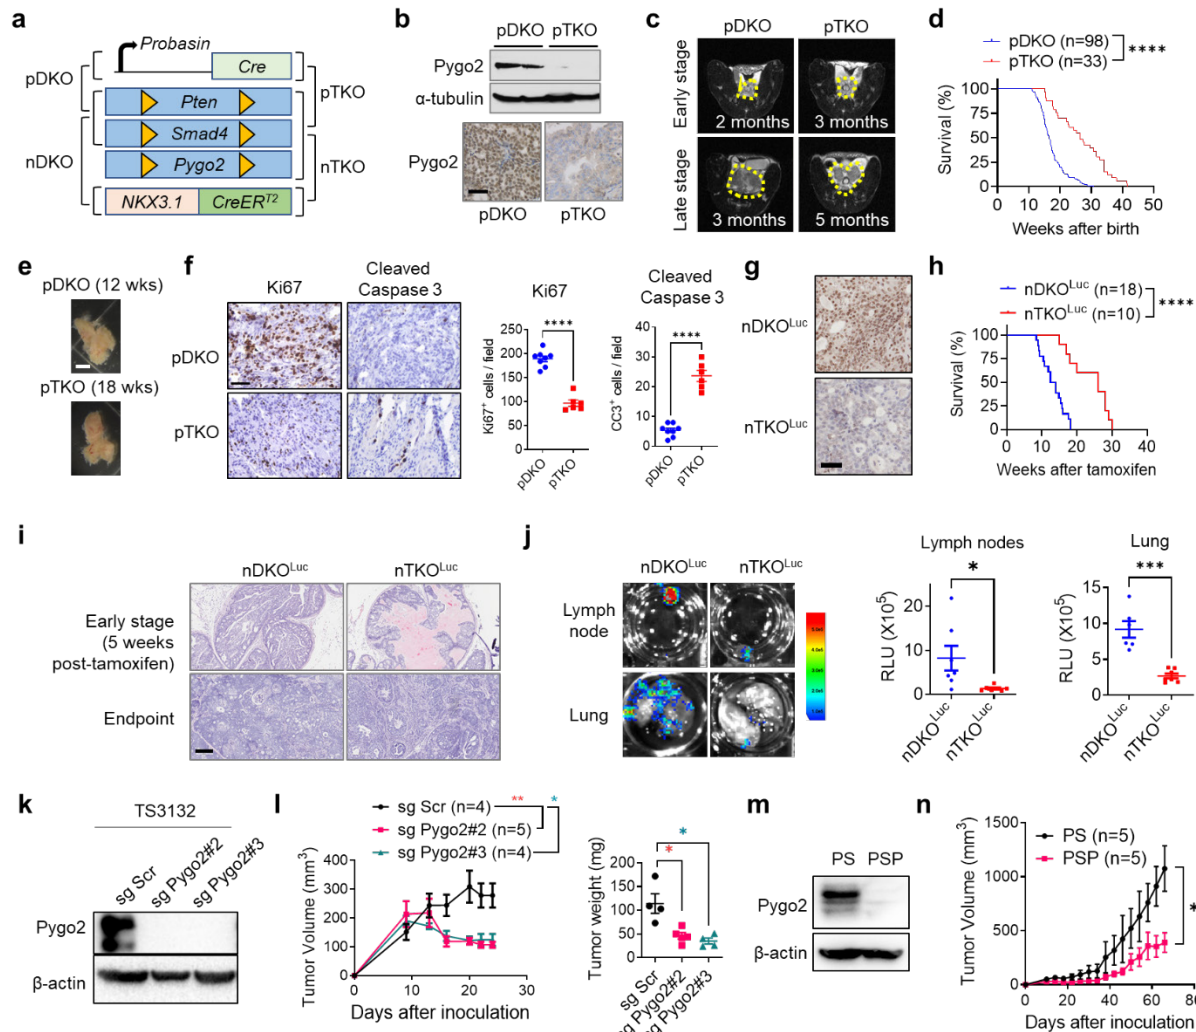

963

964 **Fig. 1 | Pygo2 promotes PCa progression and metastasis in GEM and syngeneic models.**  
 965 (a) The diagram for the generation of conditional knockout models including pDKO, pTKO, nDKO  
 966 and nTKO. (b) Pygo2 protein expression in pDKO and pTKO tumors evaluated by western blot  
 967 and IHC. Scale bar, 50µm. (c) Representative MRI images of pDKO and pTKO tumors (yellow  
 968 contour) at early and late stages. (d) Kaplan–Meier curves of pDKO (n=98) and pTKO (n=33)  
 969 mice. (e) Representative photographs of tumors from 12-week pDKO and 18-week pTKO mice,  
 970 respectively. (f) Ki67 and cleaved caspase-3 IHC staining and quantification for pDKO and pTKO  
 971 tumors (n = 6–8). Scale bar, 50µm. (g) IHC for Pygo2 in nDKO<sup>Luc</sup> and nTKO<sup>Luc</sup> tumors. Scale bar  
 972 50µm. (h) Kaplan–Meier curves of nDKO<sup>Luc</sup> (n=18) and nTKO<sup>Luc</sup> (n=10) mice after tamoxifen  
 973 induction. (i) H&E staining for nDKO<sup>Luc</sup> and nTKO<sup>Luc</sup> at early stage and endpoint. Scale bar,  
 974 200µm. (j) Bioluminescence images (left) and quantification (right) of metastases at draining  
 975 lymph nodes and lungs from nDKO<sup>Luc</sup> (n=6) and nTKO<sup>Luc</sup> (n=7) mice at the endpoint. (k) Pygo2  
 976 knockout in TS3132 with two different sgRNA, validated by western blot. (l) Subcutaneous tumor  
 977 volume (left) and endpoint weight (right) for TS3132 sublines in nude mice (n = 4–5). (m) Western  
 978 blot validating Pygo2 expression in PS and PSP cell lines. (n) Syngeneic tumor growth curves for  
 979 PS (n=5) and PSP (n=5) in C57BL/6 mice. In (d)(h), \*\*\*\*P<0.0001, log-rank test. In (f)(j)(l)(n), error  
 980 bars represent SEM; \*P<0.05, \*\*P<0.01, \*\*\*P<0.001, \*\*\*\*P<0.0001, Student’s t-test.



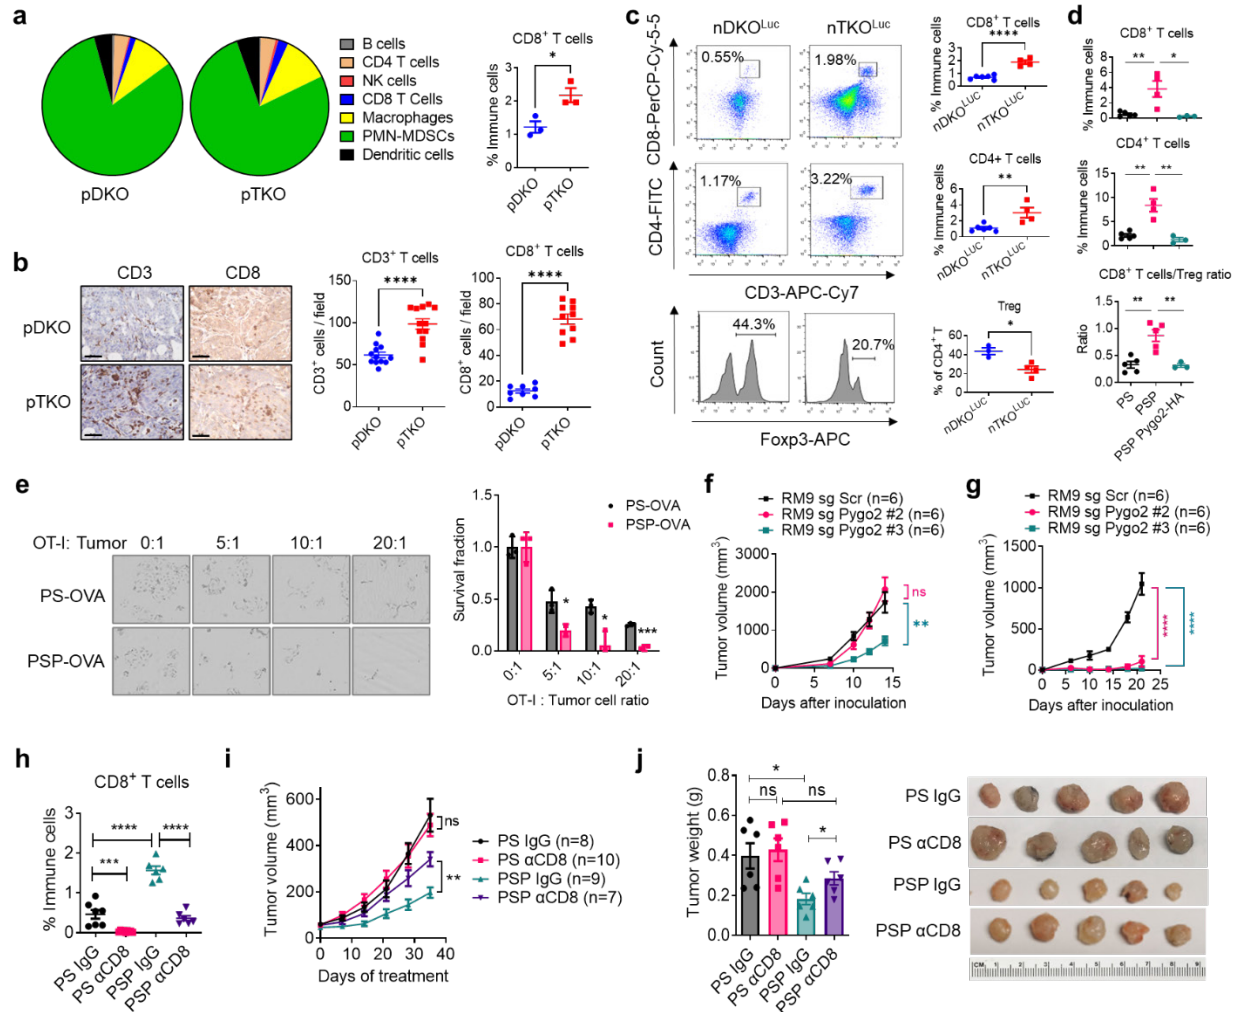

981

982 **Fig. 2 | Pygo2 inhibits CTL infiltration and attenuates CTL killing of PCa cells.**

983 **(a)** Major immune population fractions in pDKO and pTKO tumors (n=3/genotype) quantified by  
 984 CyTOF (left) with CD8<sup>+</sup> T cells showing significant difference (right). **(b)** IHC staining and  
 985 quantification for CD8 and CD3 in pDKO and pTKO tumors (n=12). **(c)** Flow cytometry  
 986 quantification of CD8<sup>+</sup>, CD4<sup>+</sup> and T<sub>reg</sub> percentages for nDKO<sup>Luc</sup> and nTKO<sup>Luc</sup> tumors (n = 3-6). **(d)**  
 987 Flow cytometry quantification of CD8<sup>+</sup> T, CD4<sup>+</sup> T, and CD8<sup>+</sup> effector/T<sub>reg</sub> ratio for syngeneic  
 988 subcutaneous tumors formed by PS, PSP, or PSP-Pygo2-HA cells (n = 3-5). **(e)** T cell cytotoxicity  
 989 assay to compare the killing of PS-OVA and PSP-OVA cells by antigen-stimulated OT-I T-cells at  
 990 different E:T ratios. Viable cancer cells were detected by resazurin (n=3). **(f-g)** Tumor growth  
 991 curves of RM9 sgScr and sgPygo2 sublines in nude (f) or C57BL/6 mice (g) (n=6). **(h-i)** Flow  
 992 cytometry quantification of intratumoral CD8<sup>+</sup> T cells and tumor growth curves for syngeneic  
 993 tumors formed by PS or PSP and treated with isotype IgG or anti-CD8 antibody (n = 6-10). **(j)**  
 994 Endpoint tumor weight (n=6) and representative tumor photographs. In all panels, error bars  
 995 represent SEM; ns, not significant, \*P<0.05, \*\*P<0.01, \*\*\*P<0.001, \*\*\*\*P<0.0001, Student's t-test.

996

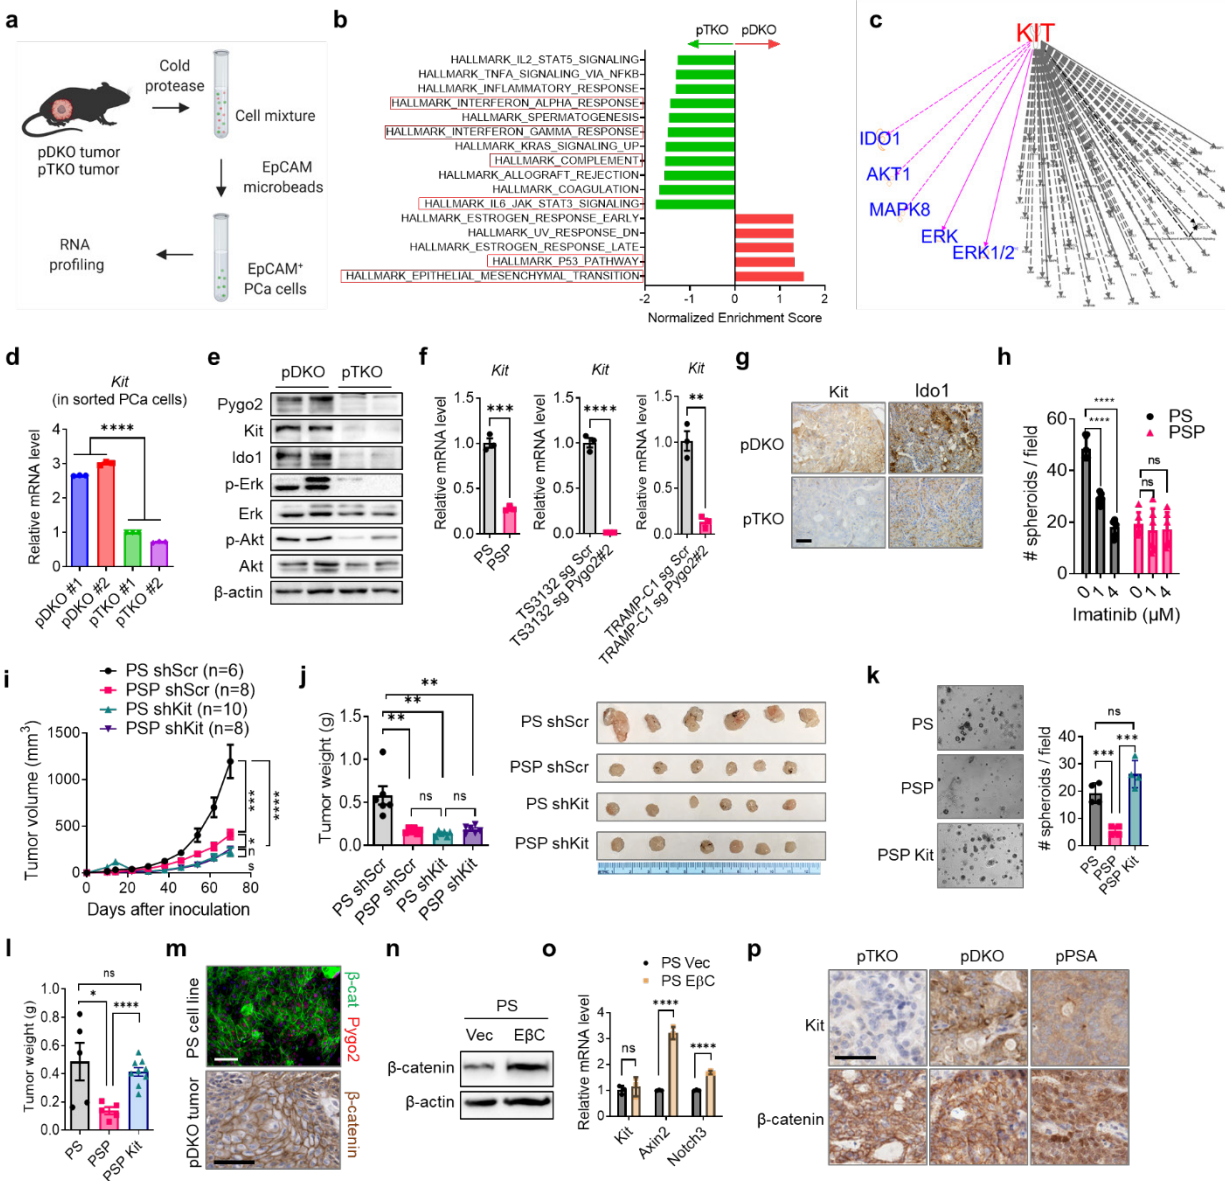

997

998 **Fig. 3 | Pygo2 promotes Pca progression through Kit upregulation in a Wnt-independent**  
 999 **manner.**

1000 (a) The schematic of tumor cell purification with EpCAM mcirobeads from pDKO (n=3) and pTKO  
 1001 (n=2) tumors followed by transcriptomic profiling. (b) Top enriched MSigDB hallmark gene sets in  
 1002 pDKO (red) or pTKO (green) tumor cells. (c) KIT downstream targets drawn based on IPA  
 1003 knowledgebase. Targets highlighted in purple include a number of DE genes (Ido1, Akt1, Mapk8)  
 1004 based on the transcriptomic profiling. (d) qRT-PCR validation of *Kit* differential expression using  
 1005 purified tumor cells from pDKO (n=3) and pTKO tumors (n=3). (e) Western blot validation of *Kit*  
 1006 and selected downstream targets in pDKO and pTKO tumors. (f) qRT-PCR measurement of *Kit*  
 1007 expression in mouse Pca cell lines (n=3). (g) IHC for *Kit* and *Ido1* in pDKO and pTKO tumors.  
 1008 Scale bar, 50µm. (h) Spheroid assay of PS and PSP cell lines treated with vehicle or imatinib  
 1009 (n=6). (i) Syngeneic tumor growth curves for PS and PSP sublines in C57BL/6 mice (n = 6-10).  
 1010 (j) Endpoint tumor weight and representative photographs of tumors formed by PS and PSP  
 1011 sublines (n=6). (k) Spheroid assay for PS, PSP and PSP-Kit (n=4). (l) Endpoint tumor weight for  
 1012 syngeneic tumors formed by PS (n=5), PSP (n=5) or PSP-Kit (n=9). (m) Representative β-catenin

1013 immunostaining results for PS cell line or pDKO tumor. Scale bar, 50 $\mu$ m. **(n)** Western blot  
1014 detecting the ectopic overexpression of E $\beta$ C in PS cells. **(o)** qRT-PCR detecting the effect of E $\beta$ C  
1015 on the expression of *Kit* and Wnt targets (*Axin2*, *Notch3*) in PS cells (n=3). **(p)** IHC detecting Kit  
1016 and  $\beta$ -catenin in pTKO, pDKO and pPSA prostate tumors. Scale bar, 50 $\mu$ m. In (d)(f)(h)(i)(j)(k)(l)(o),  
1017 error bars represent SEM; ns, not significant, \*P<0.05, \*\*P<0.01, \*\*\*P<0.001, \*\*\*\*P<0.0001,  
1018 Student's t-test.  
1019

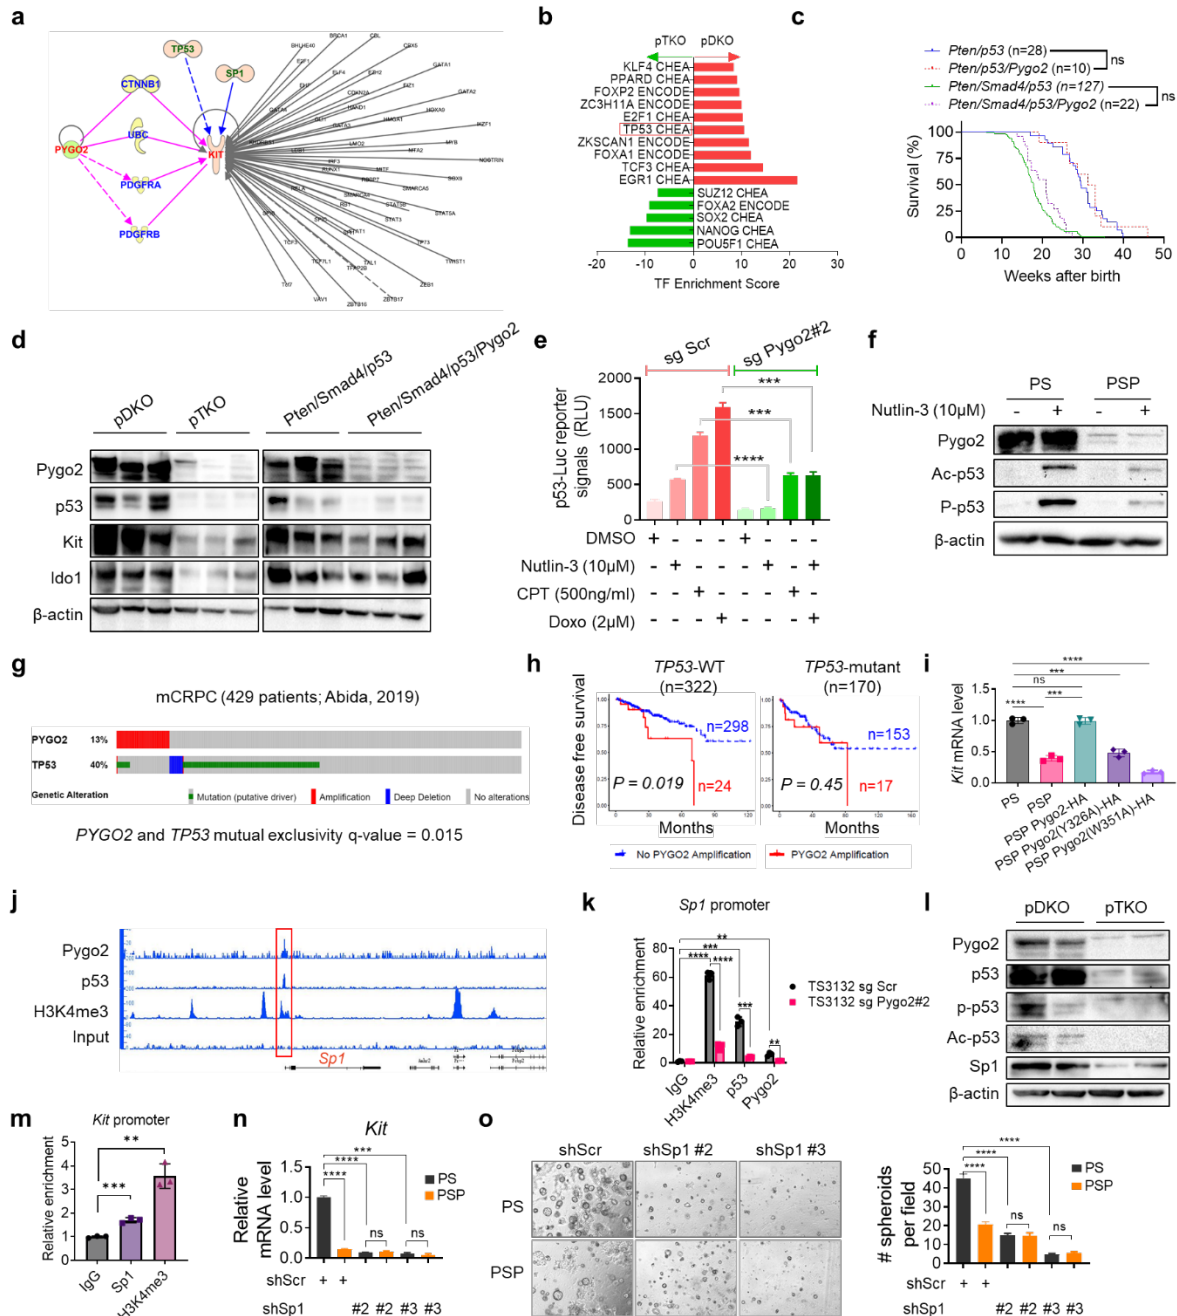

1020  
1021  
1022  
1023  
1024  
1025  
1026  
1027  
1028  
1029  
1030

**Fig. 4 | Pygo2 cooperates with p53 to upregulate the Sp1/Kit axis.**

(a) IPA result finding putative connectors (blue) between Pygo2 and Kit (red), and finding TFs (green, grey) regulating Kit. (b) TF enrichment analysis with Enrichr using ENCODE and ChEA databases for genes significantly upregulated in pDKO PCa cells compared with pTKO PCa cells. (c) Kaplan-Meier curves of four GEM cohorts, Pten/p53 (n=28), Pten/p53/Pygo2 (n=10), Pten/Smad4/p53 (n=127), and Pten/Smad4/p53/Pygo2 (n=22). ns, not significant, log-rank test. (d) Western blot measurement of Pygo2, p53, Kit and Ido1 in tumor lysates from pDKO, pTKO, Pten/Smad4/p53 and Pten/Smad4/p53/Pygo2 (n=3). (e) p53 reporter assay to detect the p53 activity in TS3132 sgScr and Pygo2-knockout cells treated with DMSO (vehicle), nutlin-3, CPT or doxorubicin (n=3). (f) Western blot measurement of Pygo2, acetyl-p53 (Lys379), phospho-p53

1031 (Ser15) in PS and PSP cell lines treated with vehicle or nutlin-3 for 24h. **(g)** Genomic alterations  
1032 of *PYGO2* and *TP53* in the mCRPC database (n=429, ref Abida et al.), visualized by cBioPortal.  
1033 **(h)** Disease free survival for patients stratified based on *TP53* mutation status followed by *PYGO2*  
1034 amplification status. Dataset from TCGA (Firehose Legacy), n and P values denoted in the graphs,  
1035 P values based on log-rank test. **(i)** qRT-PCR quantification of *Kit* expression in PS, PSP, and  
1036 PSP sublines expressing HA-tagged WT or mutant murine Pygo2 (n=3). **(j)** IGB genomic views  
1037 of the chromatin association of Pygo2, p53, and H3K4me3 at the genomic locus around *Sp1*,  
1038 based on CUT&RUN-seq of PS cell line. Red rectangle highlights the peaks in the *Sp1* promoter  
1039 region. **(k)** CUT&RUN-qPCR to quantify the association of Pygo2, p53, and H3K4me3 to the *Sp1*  
1040 promoter region in TS3132 sublines. IgG was the negative control (n=3). **(l)** Western blot  
1041 measurement of Pygo2, p53, acetyl-p53 (Lys379), phospho-p53 (Ser15), and Sp1 in pDKO and  
1042 pTKO tumors. **(m)** CUT&RUN-qPCR to quantify the association of Sp1 and H3K4me3 to the *Kit*  
1043 promoter region in TS3132. IgG was the negative control (n=3). **(n)** qRT-PCR quantification of *Kit*  
1044 expression in PS and PSP sublines with Sp1 shRNA knockdown or shScr control (n=3). **(o)**  
1045 Spheroid formation ability by PS and PSP sublines with Sp1 shRNA knockdown or shScr control  
1046 (n = 7-10). In (e) (i) (k) (m) (n) (o), error bars represent SEM; ns, not significant, \*\*P<0.01,  
1047 \*\*\*P<0.001, \*\*\*\*P<0.0001, Student's t-test.  
1048

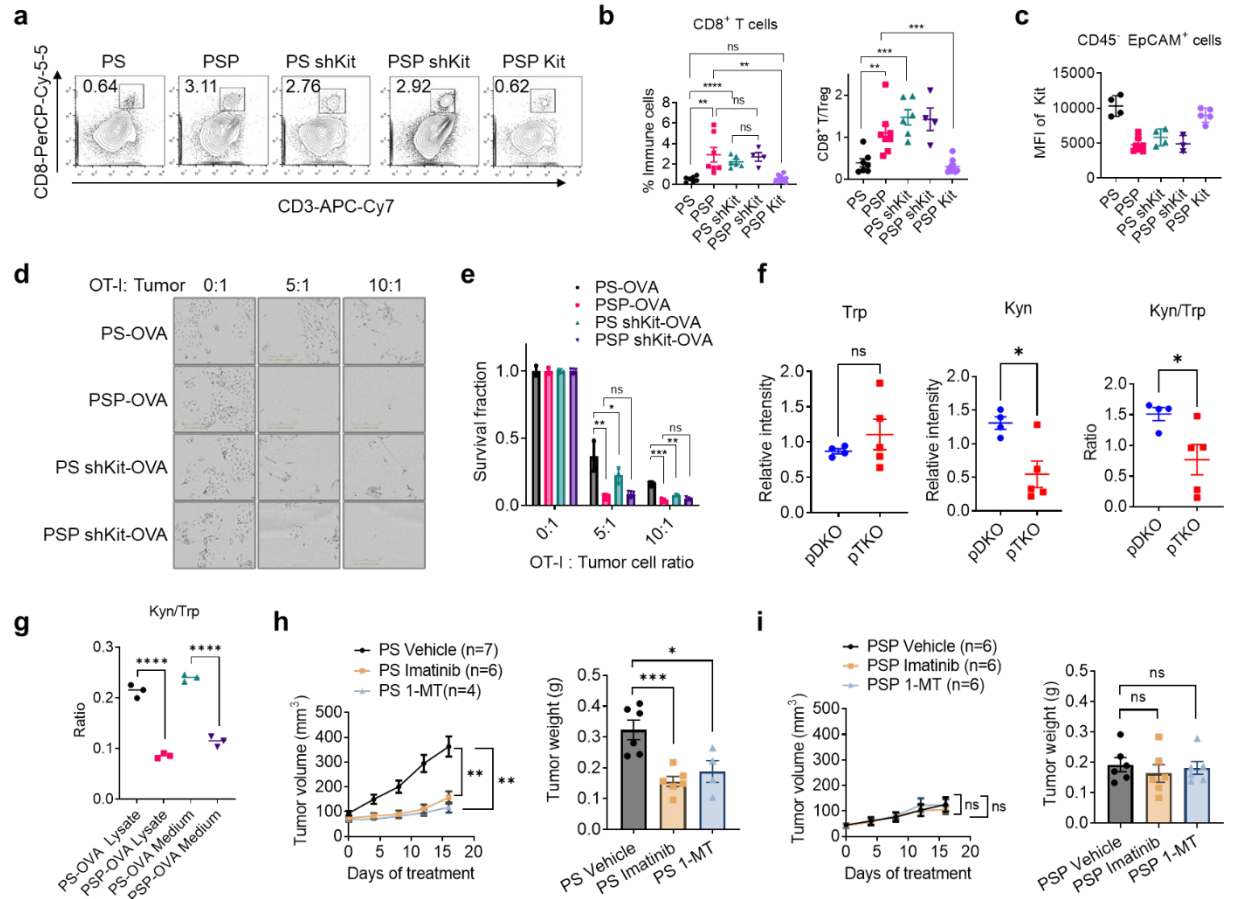

**Fig. 5 | Pygo2 downregulates T cell infiltration through the Kit-Ido1 pathway.**

(a) Representative flow cytometry plots for measuring CD3<sup>+</sup> CD8<sup>+</sup> T lymphocyte infiltration in syngeneic tumors formed by PS, PSP and sublimes. Values indicate the percentage of all CD45<sup>+</sup> immune cells. (b) Quantification of tumor-infiltrating CD8<sup>+</sup> T cells and the CD8<sup>+</sup>-T/T<sub>reg</sub> ratio for syngeneic tumors (n = 4-9). (c) Kit protein level measured by flow cytometry on cancer cells freshly isolated from tumors formed by PS, PSP and sublimes (n = 3-8). MFI, median fluorescence intensity. (d-e) T cell cytotoxicity assay to compare the killing of PS-OVA and PSP-OVA cells with and without *Kit* knockdown by antigen-stimulated OT-I T-cells at different E:T ratios (n=3). Viable cancer cells were detected by microscopy (E) and resazurin (F). (f) The normalized Trp and Kyn levels and their ratios in pDKO (n=4) and pTKO (n=5) tumor lysates, measured by mass spectrometry. (g) Kyn/Trp ratios measured by mass spectrometry for cell lysates and conditioned medium of PS-OVA (n=3) and PSP-OVA (n=3) co-cultured with OT-I T cells at ratio 1:1. (h-i) Growth curves and endpoint weight of syngeneic tumors formed by PS (n = 4-7) or PSP (n=6) in C57BL/6 mice and treated with vehicle, imatinib (50mg/kg, twice/daily), or 1-MT (400mg/kg, twice/daily). In (b)(c)(e)(f)(g)(h)(i), error bars represent SEM; ns, not significant, \*P<0.05, \*\*P<0.01, \*\*\*P<0.001, \*\*\*\*P<0.0001, Student's t-test.

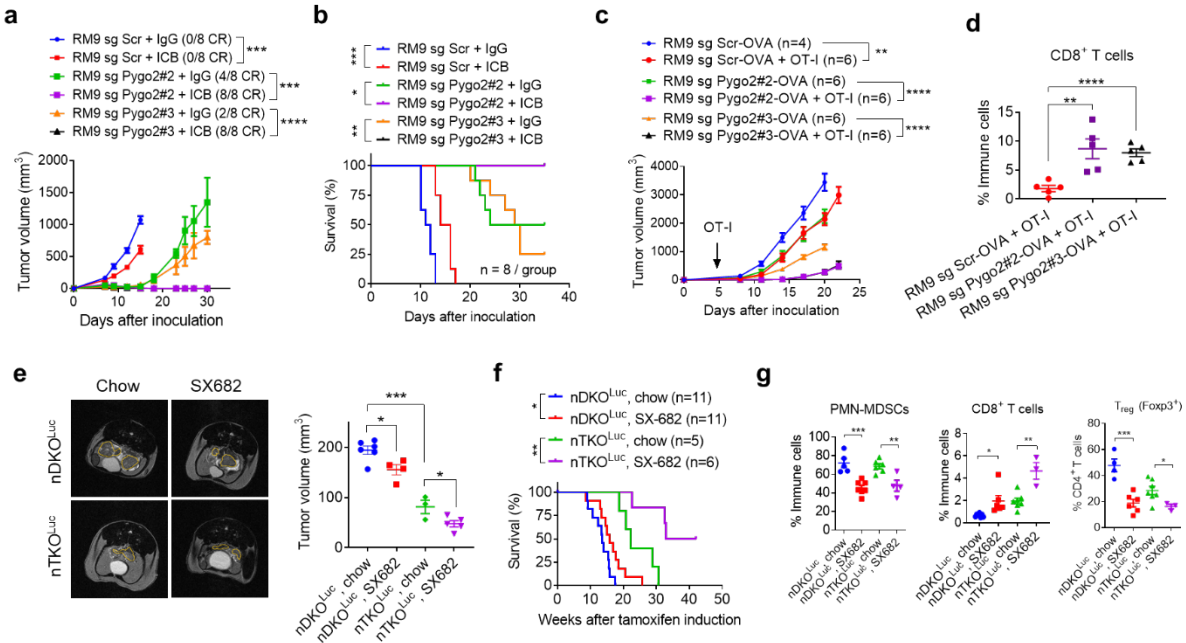

1067  
1068  
1069  
1070  
1071  
1072  
1073  
1074  
1075  
1076  
1077  
1078  
1079  
1080  
1081  
1082  
1083  
1084

**Fig. 6 | Deletion of Pygo2 enhances efficacy from ICB, adoptive T cell therapy and CXCR2 inhibitor.**

(a-b) Tumor growth curves and survival analysis for C57BL/6 mice inoculated with RM9 sgScr or sgPygo2 sublines and treated with IgG or ICB (anti-PD1 plus anti-CTLA4). n=8 for each group, CR, complete regression. (c) Tumor growth curves for ACT experiment, where nude mice inoculated with OVA-expressing RM9 sgScr or sgPygo2 sublines were infused with OVA-stimulated OT-I CD8<sup>+</sup> T cells (1 x 10<sup>7</sup>) through tail vein at the arrow-indicated timepoint (n = 4 - 6). (d) Flow cytometry quantification of tumor-infiltrating CD8<sup>+</sup> T cells for nude mice bearing indicated tumors one week of OT-I T cell infusion. (e) Representative MRI images and tumor volume quantification of nDKO<sup>Luc</sup> and nTKO<sup>Luc</sup> mice fed with with standard chow or SX-682-admixed diet. Mice were imaged 12 weeks after tamoxifen induction, n = 3 - 6. Prostate regions were demarcated in yellow. (f) Kaplan-Meier curves for standard or SX-682 diet treated nDKO<sup>Luc</sup> and nTKO<sup>Luc</sup> mice (n = 5 - 11). (g) Flow cytometry quantification of tumor-infiltrating PMN-MDSCs, CD8<sup>+</sup> T, T<sub>reg</sub> (as fractions of CD4<sup>+</sup> T cells) for standard or SX-682 diet treated nDKO<sup>Luc</sup> and nTKO<sup>Luc</sup> mice. In (a)(c)(d)(e)(g), error bars represent SEM. \*P<0.05, \*\*P<0.01, \*\*\*P<0.001, \*\*\*\*P<0.0001, Student's t-test. In (b)(f), \*P<0.05, \*\*P<0.01, \*\*\*P<0.001, log-rank test.

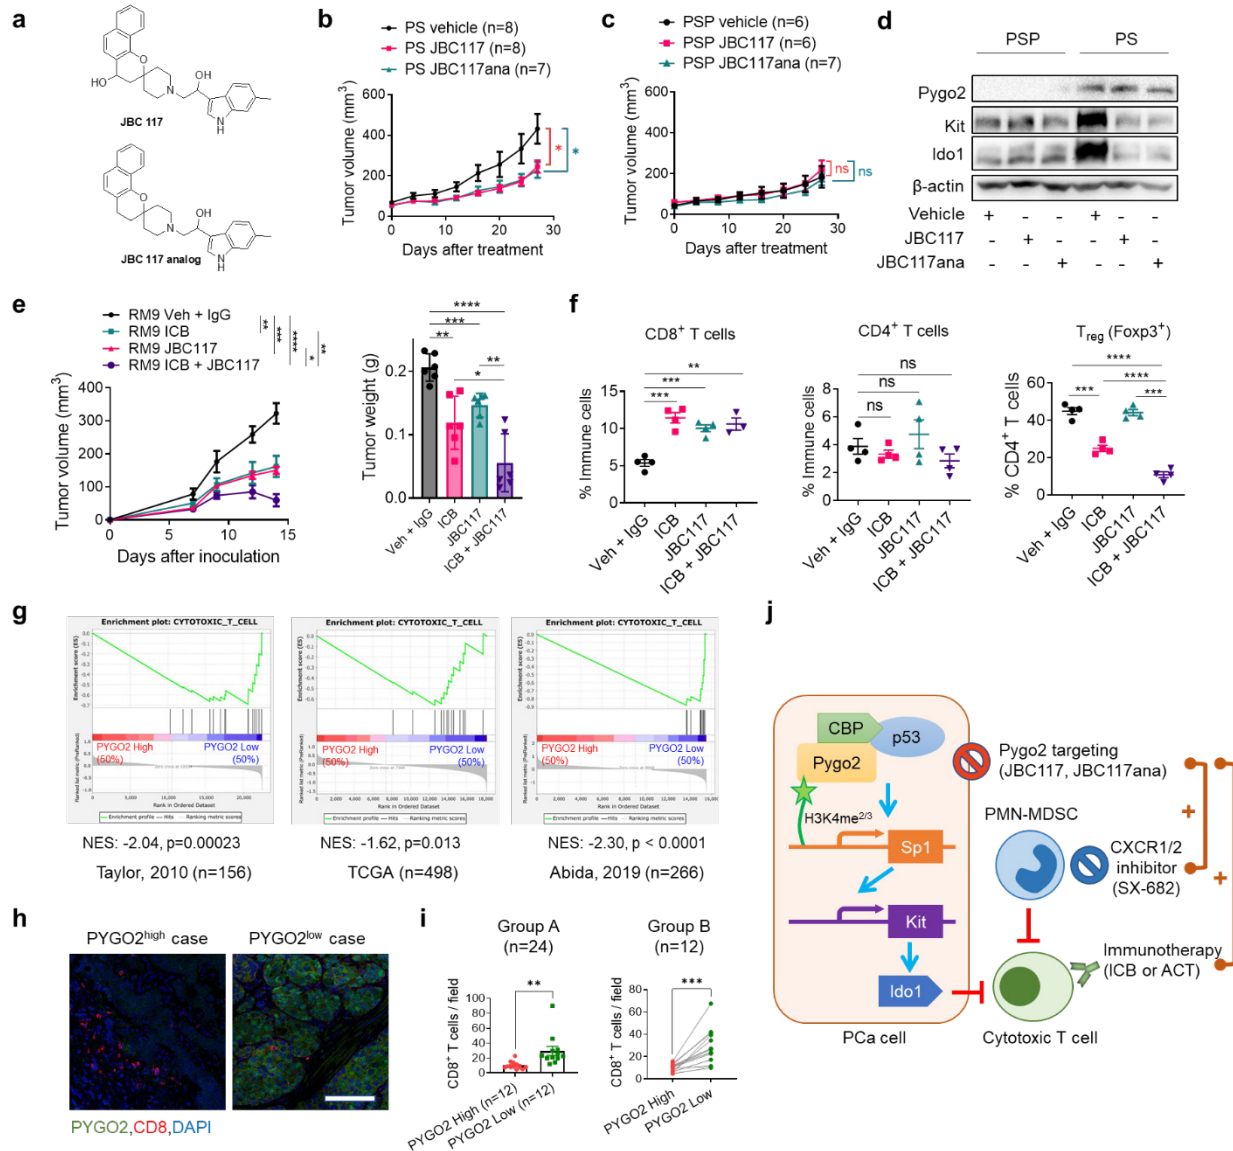

1085  
1086  
1087  
1088  
1089  
1090  
1091  
1092  
1093  
1094  
1095  
1096  
1097  
1098  
1099  
1100  
1101

**Fig. 7 | Pygo2 inhibitors antagonize PCa progression and enhance immunotherapy.**

(a) The structure of prototype Pygo2 inhibitors JBC117 and JBC117ana. (b) Growth curves for syngeneic tumors formed by PS treated with vehicle, JBC117 or JBC117ana (n = 7 - 8). (c) Growth curves for syngeneic tumors formed by PSP treated with vehicle, JBC117 or JBC117ana (n = 6 - 7). (d) Western blot to detect Pygo2, Kit and Ido1 in tumor lysates from the treatment groups. (e) Growth curves (left) and endpoint weight (right) for syngeneic tumors formed by RM9 and treated with control (vehicle plus IgG), ICB (anti-PD1 plus anti-CTLA4), JBC117, or ICB + JBC117 (n=6 per group). (f) Flow cytometry quantification of CD8<sup>+</sup>, CD4<sup>+</sup>, and T<sub>reg</sub> cells from RM9 tumors treated with vehicle + IgG, ICB, JBC117, or ICB + JBC117 (n = 3 - 4). (g) GSEA result showing the enrichment of a CTL gene signature to PCa cases with low PYGO2 level than the ones with high PYGO2 level across 3 transcriptome databases. (h) Representative co-IF staining result of PYGO2 and CD8 in primary PCa with high PYGO2 (left) and low PYGO2 (right). Scale bar, 100µm. (i) Quantification of CD8 staining in primary PCa samples with relatively homogeneous PYGO2 staining pattern (Group A) or relatively heterogeneous PYGO2 staining pattern (Group B). In Group A (n=24), cases were stratified as high (intense) and low (weak) PYGO2 staining subgroups. In Group B (n=12), on the tissue sections, areas with high and low PYGO2 staining



1102 were demarcated for quantifying CD8<sup>+</sup> T cells. **(j)** Schematic illustration of Pygo2 immuno-  
1103 modulatory function and therapeutic opportunity in PCa. Pygo2 binds to H3K4me2/3 and engages  
1104 CBP/p300 and p53 to activate Sp1 expression. Sp1 in turn upregulates Kit which induces Ido1 to  
1105 impair CTLs and augment T<sub>reg</sub> (not drawn). Therapeutically, Pygo2 inhibition decelerates prostate  
1106 tumor growth and synergizes with different classes of immunotherapeutics to eradicate PCa. In  
1107 (b)(c)(e)(f)(i), error bars represent SEM; ns, not significant, \*P<0.05, \*\*P<0.01, \*\*\*P<0.001,  
1108 \*\*\*\*P<0.0001, Student's t-test (paired for I, group B; unpaired for all others).  
1109

1110  
1111

## EXTENDED DATA

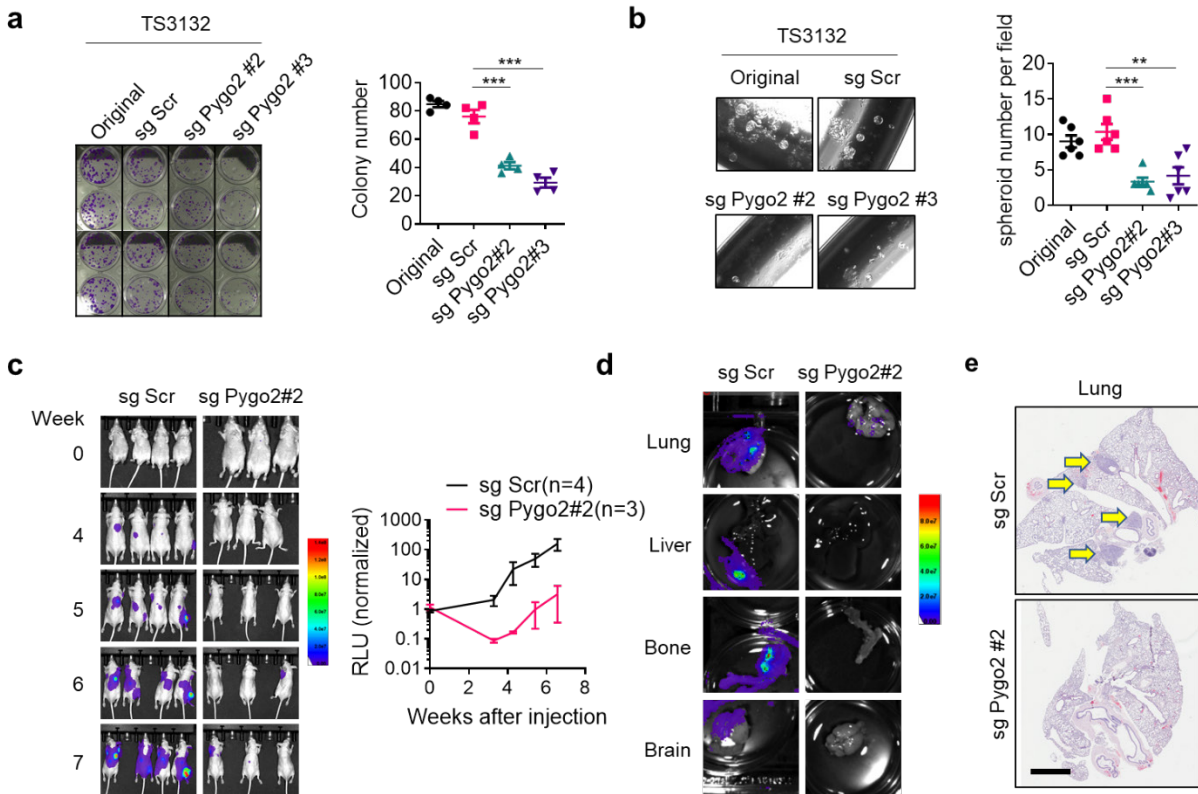

1112  
1113  
1114  
1115  
1116  
1117  
1118  
1119  
1120  
1121  
1122  
1123  
1124

**Extended Data Fig. 1 | Pygo2 promotes prostate cancer proliferation and metastasis in xenograft models. (a)** Two-dimensional colony formation by TS3132 control and Pygo2-knockout sublines.  $***P < 0.001$ , Student's t-test ( $n=4$ ). **(b)** Tumor spheroid assay for TS3132 control and Pygo2-knockout sublines.  $**P < 0.01$ ,  $***P < 0.001$ , Student's t-test ( $n=6$ ). **(c)** Bioluminescence images and quantification of metastasis signals in nude mice after intracardiac injection of TS3132-sgScr ( $n=4$ ) or TS3132-sgPygo2#2 ( $n=3$ ). **(d)** Representative bioluminescence images of various organs from nude mice injected with TS3132-sgScr or TS3132-sgPygo2#2. **(e)** H&E staining for lungs from nude mice injected with TS3132-sgScr or TS3132-sgPygo2#2. Yellow arrows denote metastasis nodules. Scale bar, 2mm.

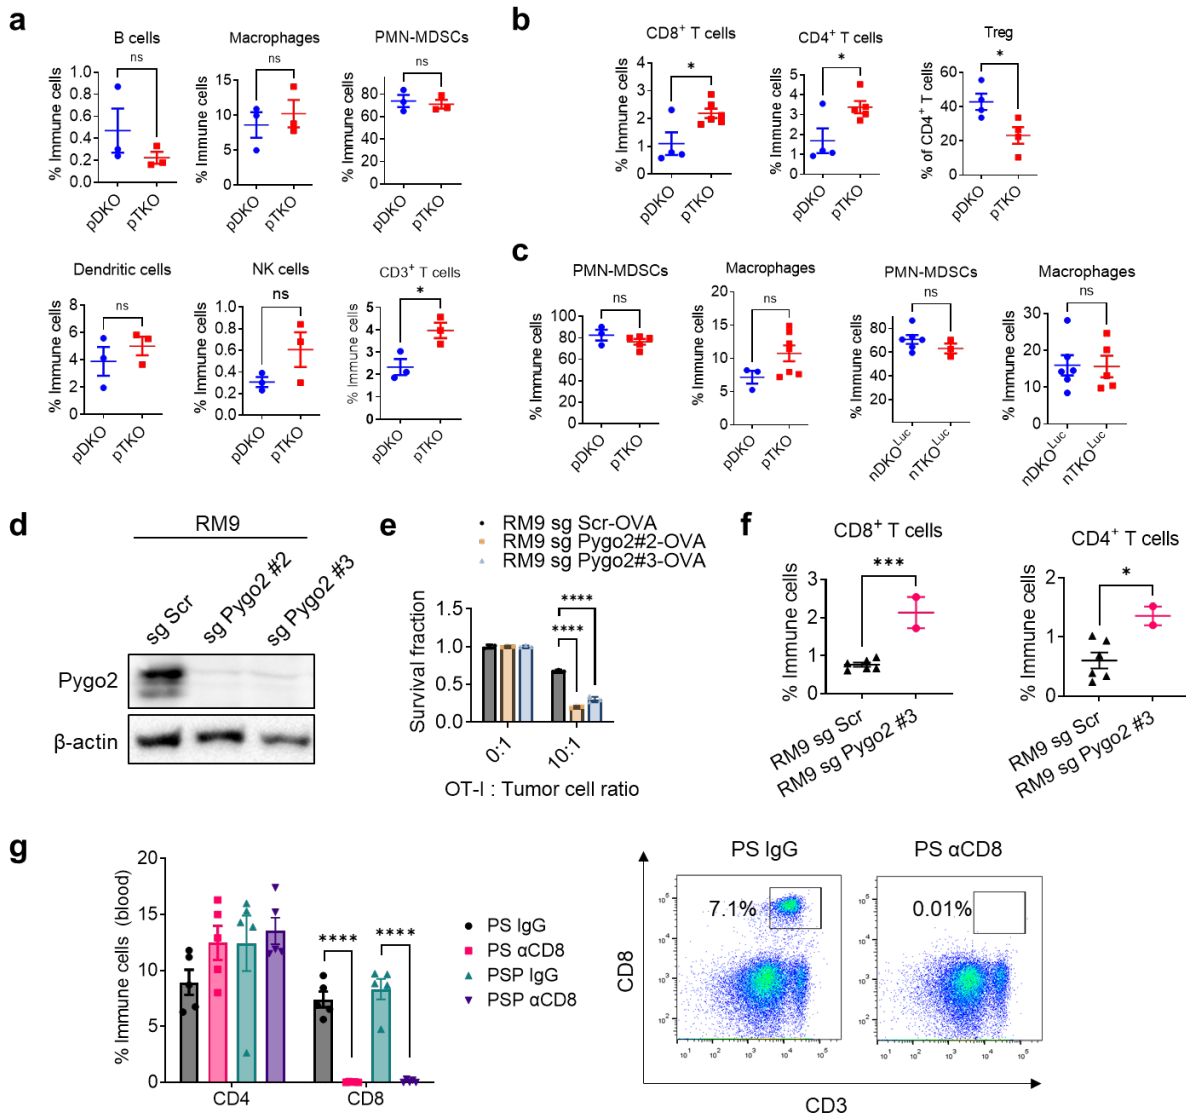

1125  
1126

1127 **Extended Data Fig. 2 | Pygo2 inhibits CTL infiltration and attenuates OT-I T cell killing of**  
 1128 **RM9-OVA cells. (a)** Immune cell infiltration quantified with CyTOF for pDKO and pTKO tumors  
 1129 (n=3). **(b)** Flow cytometry quantification of tumor-infiltrating T cell subsets in pDKO and pTKO  
 1130 tumors (n = 4-6). **(c)** Flow cytometry quantification of tumor-infiltrating PMN-MDSCs (CD11b<sup>+</sup>  
 1131 Gr1<sup>high</sup>) and macrophages (CD11b<sup>+</sup> F4/80<sup>+</sup>) in pDKO and pTKO tumors as well as nDKO<sup>LUC</sup> and  
 1132 nTKO<sup>LUC</sup> tumors (n = 3-7). **(d)** Pygo2 expression in RM9 sgScr and sgPygo2 sublines, detected  
 1133 by western blot. **(e)** T cell cytotoxicity assay to compare the killing of RM9 sgScr and sgPygo2  
 1134 sublines by antigen-stimulated OT-I T-cells. Viable cancer cells were detected by resazurin (n=3).  
 1135 **(f)** Flow cytometry quantification of CD8<sup>+</sup> and CD4<sup>+</sup> T cells in syngeneic tumors formed by RM9  
 1136 sgScr (n=6) and sgPygo2 sublines (n=2). **(g)** Flow cytometry to confirm the depletion of CD8<sup>+</sup>  
 1137 T cells (but not CD4<sup>+</sup> T cells ) in the blood by anti-CD8 antibody treatment (n=5). In all panels, error  
 1138 bars represent SEM; ns, not significant; \*P<0.05, \*\*\*P<0.001, \*\*\*\*P<0.0001, Student's t-test.  
 1139

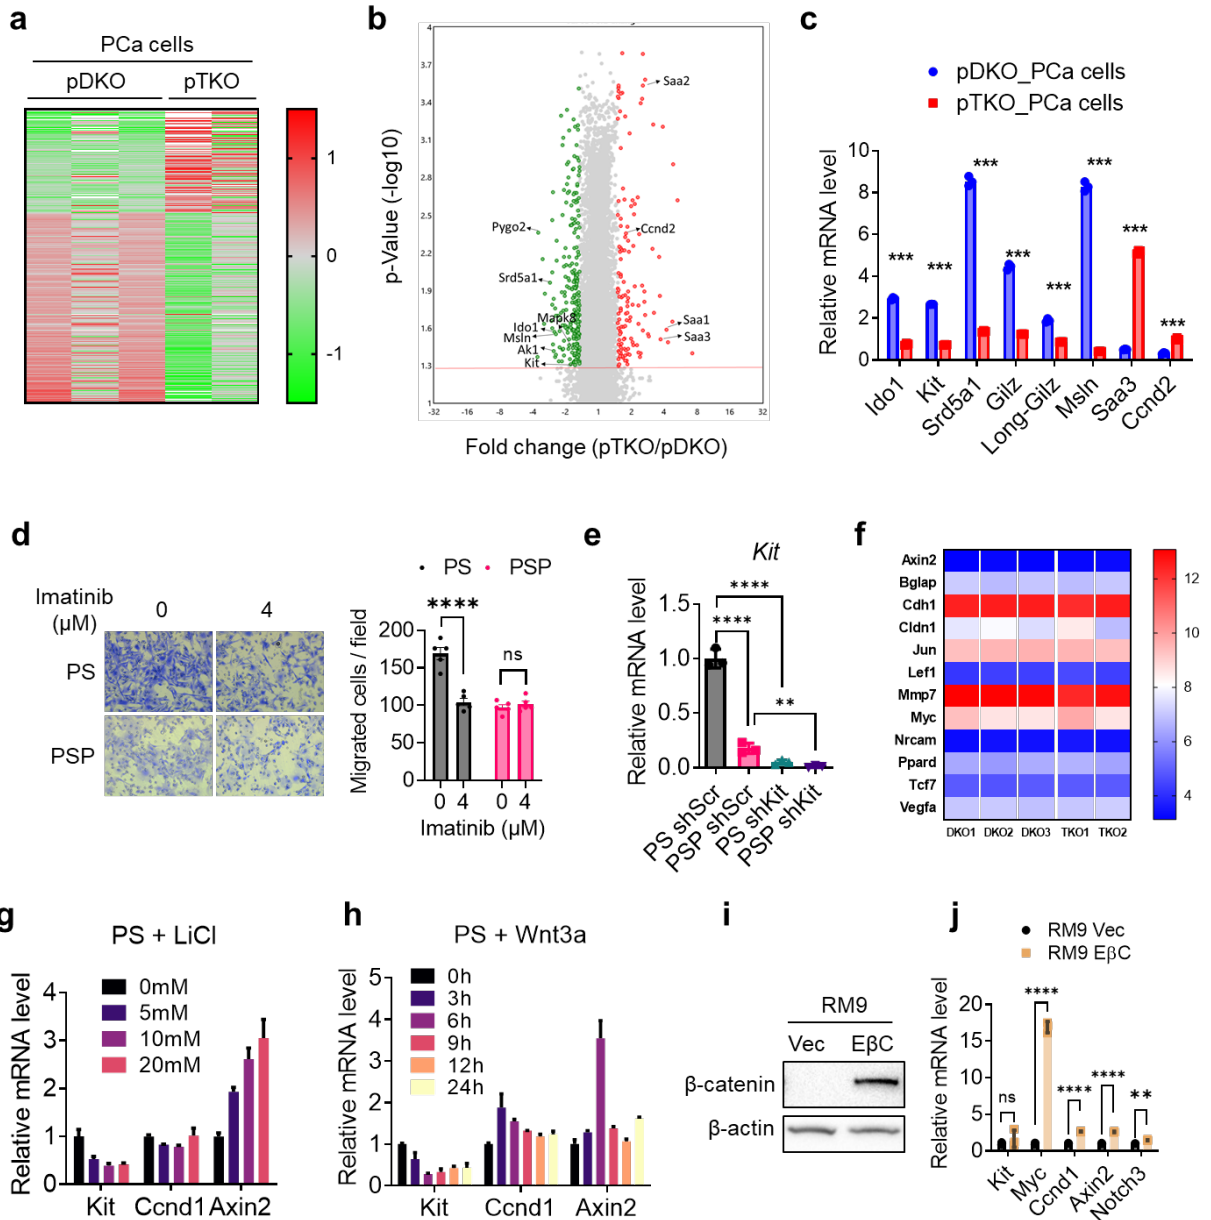

1140  
1141 **Extended Data Fig. 3 | Pygo2 upregulates kit independently on Wnt signaling.** (a) Heatmap  
1142 of 379 differentially expressed gene probes between pDKO and pTKO microbead-sorted tumor  
1143 cells ( $P < 0.05$ , fold change  $> 1.5$ ). (b) Volcano plot showing the differential gene expression. Red  
1144 line indicates the P value of 0.05. (c) qRT-PCR validating a short list of DE genes using PCa cells  
1145 purified from pDKO and pTKO tumors, independently from the samples used in the microarray  
1146 ( $n = 3$ ). (d) Representative images and quantification of transwell assay to measure the migration  
1147 of PS and PSP cells treated with vehicle or imatinib ( $n = 5$ ). (e) qRT-PCR validating the shRNA-  
1148 knockdown of *Kit* in PS and PSP ( $n = 3$ ). (f) Heatmap of Wnt downstream targets expressed in  
1149 pDKO and pTKO tumor cells based on microarray data. (g-h) qRT-PCR to measure expression  
1150 of *Kit* and Wnt downstream targets *Ccnd1* and *Axin2* in PS cells treated with LiCl or Wnt3a  
1151 conditioned medium ( $n = 3$ ). (i) Western blot validating the overexpression of EβC in RM9. (j) qRT-  
1152 PCR detecting the effect of EβC on the expression of *Kit* and Wnt targets (*Myc*, *Ccnd1*, *Axin2*,  
1153 *Notch3*) in RM9 ( $n = 3$ ). In (c)(d)(e)(f)(h)(j), error bars represent SEM; ns, not significant; \*\* $P < 0.01$ ,  
1154 \*\*\* $P < 0.001$ , \*\*\*\* $P < 0.0001$ , Student's t-test.

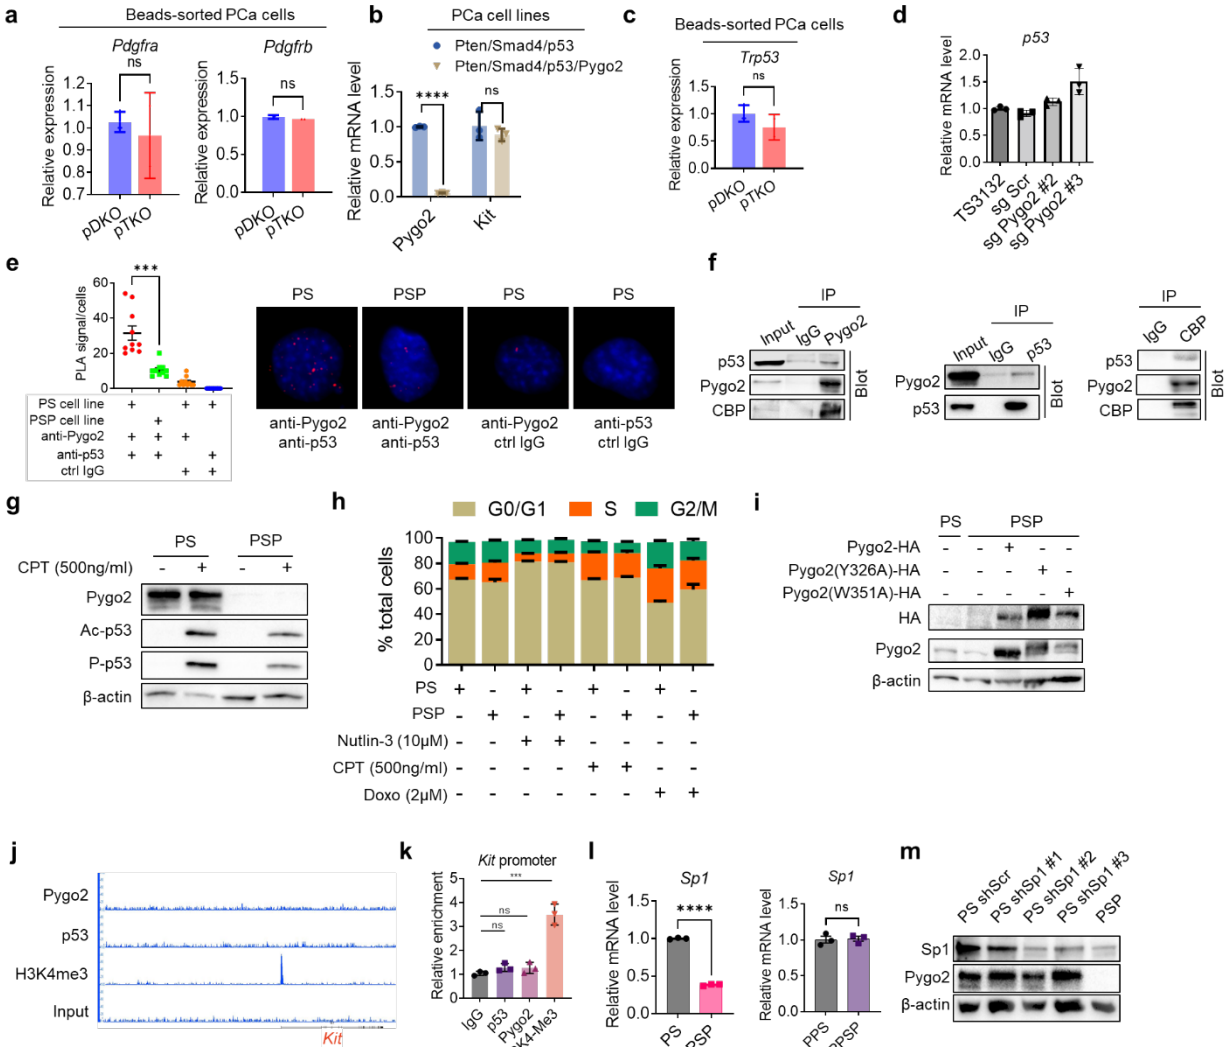

1155  
 1156 **Extended Data Fig. 4 | Pygo2 cooperates with p53 to upregulate the Sp1/Kit axis. (a)** *Pdgfra*  
 1157 and *Pdgfrb* expression in pDKO (n=3) and pTKO (n=2) PCa cells based on normalized microarray  
 1158 data. **(b)** qRT-PCR for *Pygo2* and *Kit* expression in murine PCa cell lines PPS (n=3) and PPSP  
 1159 (n=3) established from *Pten/Smad4/p53* and *Pten/Smad4/p53/Pygo2* tumors, respectively. **(c)**  
 1160 *p53* expression in pDKO (n=3) and pTKO (n=2) PCa cells based on normalized microarray data.  
 1161 **(d)** qRT-PCR for *p53* expression in TS3132 and its sublines (sgScr, sgPygo2) (n=3). **(e)** PLA  
 1162 assay to assess the proximity of Pygo2 and p53 in PS and PSP cell lines, shown in quantification  
 1163 plots and representative images (n=10). **(f)** co-IP/immunoblot to detect protein-protein interactions  
 1164 between Pygo2, p53 and p300/CBP. **(g)** Western blot to detect Pygo2, acetyl-p53 (Lys382),  
 1165 phospho-p53 (Ser15) in PS and PSP cell lines treated with vehicle or CPT. **(h)** Cell cycle analysis  
 1166 by flow cytometry for PS and PSP cell lines treated with DMSO (control), nutlin-3, CPT or  
 1167 doxorubicin for 24h. **(i)** Western blot confirming the overexpression of HA-tagged WT, Y326A or  
 1168 W351A mutant Pygo2 in PSP cell line. **(j)** IGB genomic views showing the lack of association of  
 1169 Pygo2 or p53 to the *Kit* promoter region, based on CUT&RUN-seq of PS cell line. **(k)** CUT&RUN-  
 1170 qPCR to show the lack of association of Pygo2 or p53 to the *Kit* promoter region. IgG was the  
 1171 negative control (n=3). **(l)** qRT-PCR to detect *Sp1* expression between PS and PSP cell lines,  
 1172 and between *Pten/Smad4/p53* (PPS) and *Pten/Smad4/p53/Pygo2* (PPSP) cell lines (n=3). **(m)**  
 1173 Western blot validating the shRNA knockdown of *Sp1* in PS cell line. In (a)(b)(c)(d)(e)(k)(l)(m),  
 1174 error bars represent SEM; ns, not significant, \*\*\*P<0.001, \*\*\*\*P<0.0001, Student's t-test.

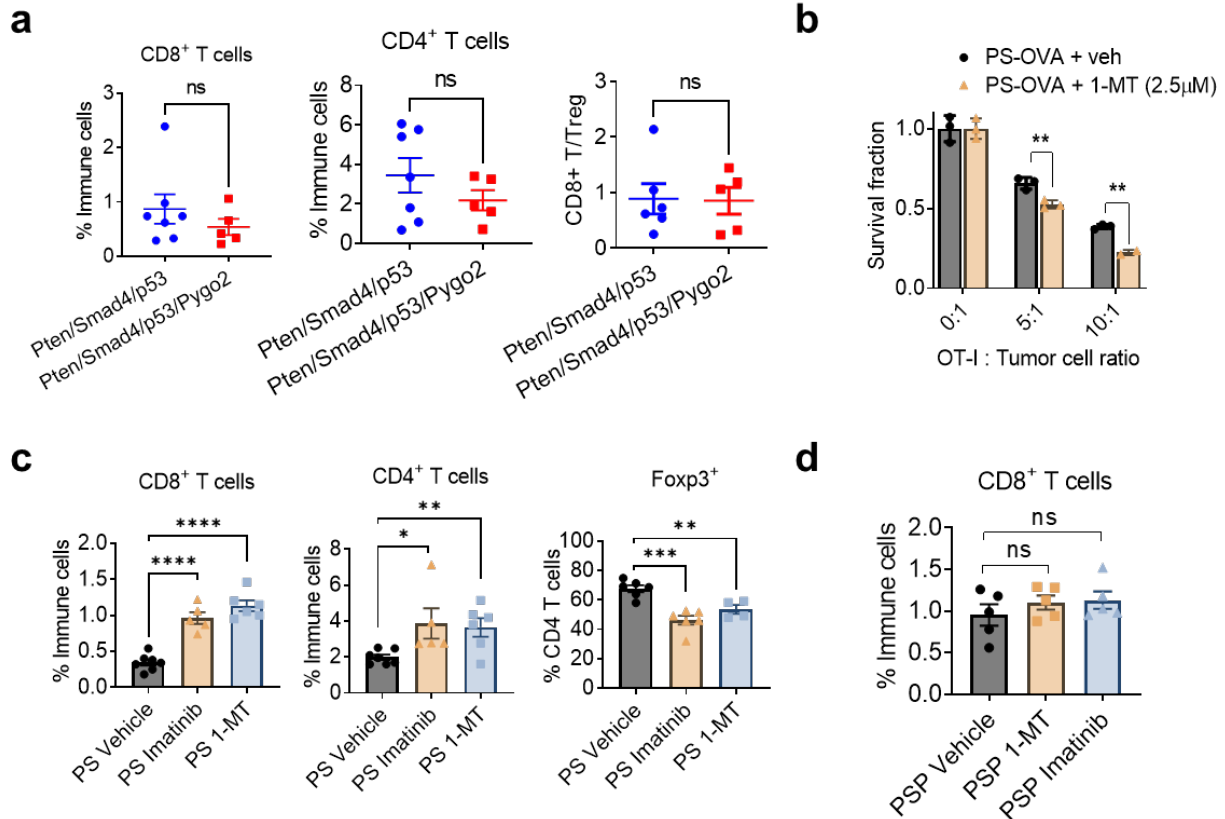

1175  
 1176 **Extended Data Fig.5 | Pygo2 downregulates T cell infiltration through the Kit-Ido1**  
 1177 **pathway. (a)** Flow cytometry quantification of CD8<sup>+</sup>, CD4<sup>+</sup>, and CD8<sup>+</sup>-T/T<sub>reg</sub> ratio in fully  
 1178 developed prostate tumors of Pten/Smad4/p53 and Pten/Smad4/p53/Pygo2 mice (n = 5 - 7). **(b)**  
 1179 T cell cytotoxicity assay to compare the killing of PS-OVA in the presence of vehicle or 1-MT by  
 1180 antigen-stimulated OT-I T-cells at different E:T ratios (n=3). Viable cancer cells were quantified  
 1181 with resazurin. **(c)** Flow cytometry quantification of tumor-infiltrating CD8<sup>+</sup>, CD4<sup>+</sup>, and Foxp3<sup>+</sup>  
 1182 T<sub>reg</sub> cells in PS syngeneic tumors (n = 4 - 7) treated with vehicle, imatinib (50mg/kg, twice/daily),  
 1183 or 1-MT (400mg/kg, twice/daily). **(d)** Flow cytometry quantification of tumor-infiltrating CD8<sup>+</sup> T  
 1184 cells in PSP syngeneic tumors (n=5) treated with vehicle, imatinib (50mg/kg, twice/daily), or 1-  
 1185 MT (400mg/kg, twice/daily). In all panels, error bars represent SEM; ns, not significant; \*P<0.05,  
 1186 \*\*P<0.01, \*\*\*P<0.001, \*\*\*\*P<0.0001, Student's t-test.

1187

**a**

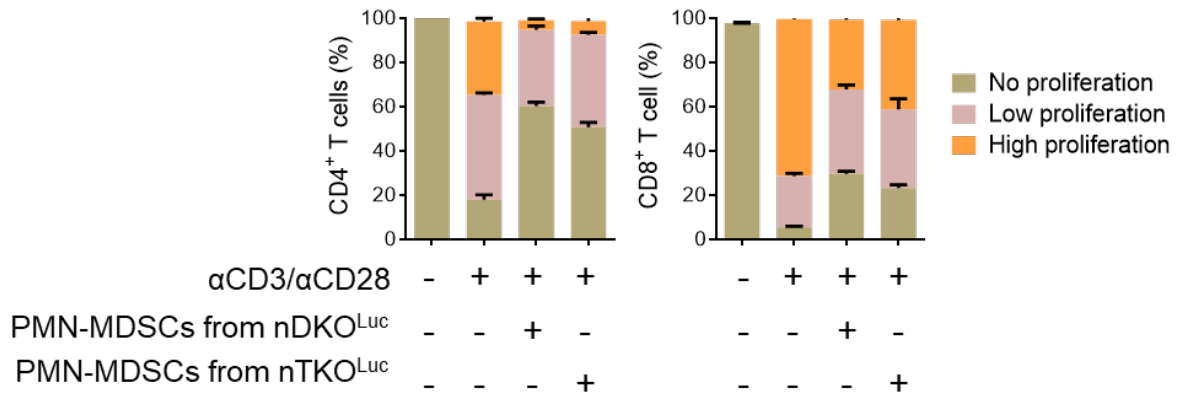

**b**

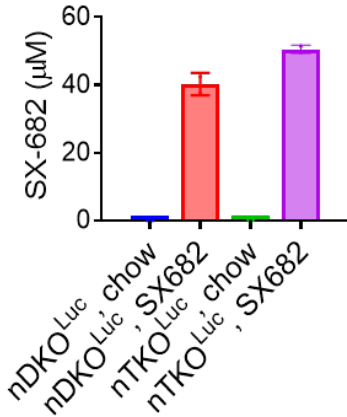

**c**

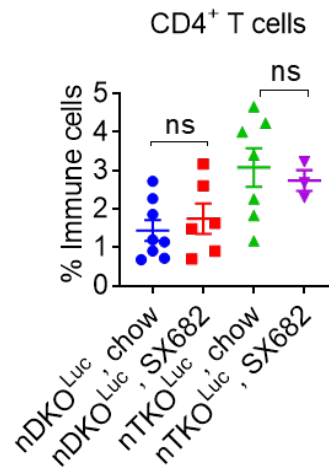

1188

1189

1190

1191 **Extended Data Fig. 6 | Deletion of Pygo2 enhances efficacy of CXCR2 inhibitor. (a)** CD4<sup>+</sup>

1192 (left) and CD8<sup>+</sup> (right) T cell proliferation assay with and without anti-CD3/anti-CD28 stimulation

1193 and co-cultured 1:2 with PMN-MDSCs isolated from nDKO<sup>Luc</sup> or nTKO<sup>Luc</sup> tumors. High, moderate,

1194 and no proliferation was defined as T-cell division  $\geq$  2, 1, and 0, respectively based on CFSE

1195 peaks (n = 3). **(b)** SX-682 concentration measured with HPLC in the plasma of mice treated with

1196 standard or SX-682 diet for one month. **(c)** Flow cytometry quantification of CD4<sup>+</sup> T cells in tumors

of indicated groups. In all panels, error bars represent SEM; ns, not significant, Student's t-test.

1197

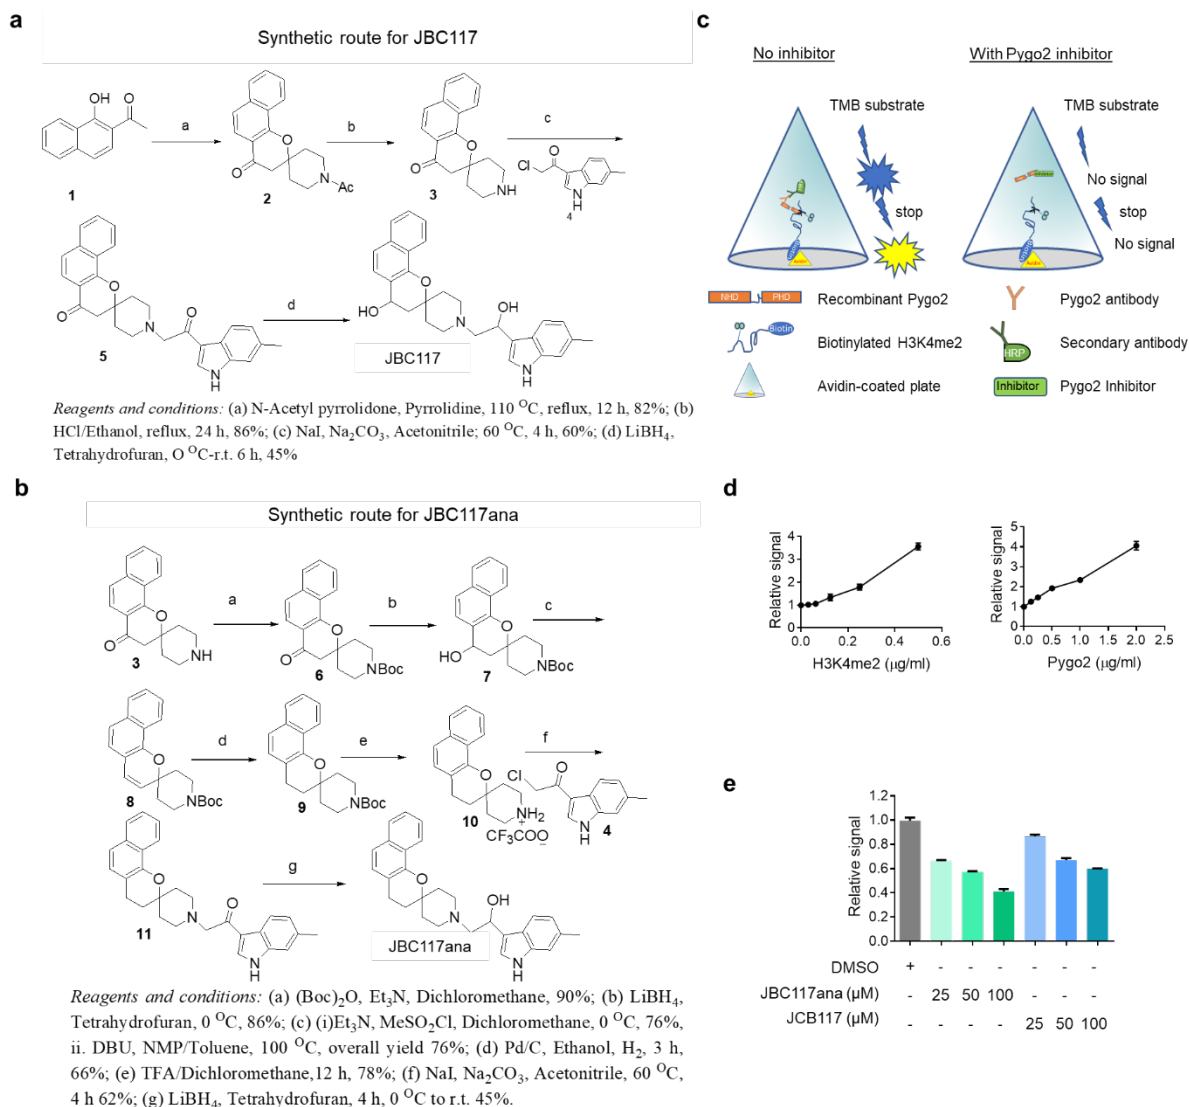

1198  
1199

1200 **Extended Data Fig.7 | Pygo2 inhibitors antagonize PCa progression and enhance**  
 1201 **immunotherapy. (a)** Synthetic route for JBC117. Synthesis was started from commercially  
 1202 available 1-Hydroxy-2-Acetonaphthone (1). At first 1-Hydroxy-2-Acetonaphthone was treated with  
 1203 1-Acetyl-4-piperidinone at refluxing condition to get the tetra cyclic intermediate (2). Then acid-  
 1204 catalyzed acetyl group deprotection produced the corresponding amine (3), the amine was then  
 1205 coupled with 2-Chloro-1-(6-methyl-1H-indol-3-yl)-ethanone in presence of Na<sub>2</sub>CO<sub>3</sub> to get the  
 1206 intermediate (5), The latter LiBH<sub>4</sub> reduction of the coupling product (5) generated the desired final  
 1207 product JBC117. **(b)** Synthetic route for JBC117ana. For the synthesis, the tetracyclic amine (3)  
 1208 was protected by (Boc)<sub>2</sub>O, followed by LiBH<sub>4</sub> reduction generated the alcohol (7), the alkene  
 1209 tetracyclic intermediate (8) was synthesized from the alcohol (7) via the following sequence of  
 1210 steps: mesylation (NEt<sub>3</sub>, MsCl), elimination at higher temperature (DBU, NMP). The intermediate  
 1211 (8) was treated with Pd/C under hydrogen atmosphere to get the *boc*-protected saturated  
 1212 intermediate (9). Then compound (9) was deprotected with TFA and the free amine was obtained  
 1213 *in situ* in presence of excess Na<sub>2</sub>CO<sub>3</sub> in the reaction mixture. Similarly, the free amine (generated  
 1214 *in situ* in the reaction mixture) was coupled with 2-Chloro-1-(6-methyl-1H-indol-3-yl)-ethanone (4)  
 1215 to generate the intermediate (11). Then LiBH<sub>4</sub> mediated reduction was done to get the final  
 1216 product JBC117ana. **(c)** The schematic of the ELISA assay. **(d)** ELISA signals increasing



1217 proportionally to the concentrations of H3K4me2 (left) or Pygo2 (right) in the absence of inhibitors.  
1218 **(e)** Inhibition of Pygo2-H3K4me2 interaction by JBC117 and JBC117ana in a dose-dependent  
1219 manner as measured by ELISA. In (d) and (e), error bars represent SEM.
